# Supplementary material
Source: PubMed Central journal article supplement (PMC4907800)
Supplement: NIHMS738400-supplement-supplement_1.pdf [file NIHMS738400-supplement-supplement_1.pdf]

Online table 1: Up and down-regulated molecules comparing coiled versus untreated aneurysms, determined by IPA.

| Gene Symbol    | Gene name                                                                      | Gene main function determined by Gene Ontology                                                  | Fold Change | P Value  | False Discovery Rate (q Value) | Direction of Expression |
|----------------|--------------------------------------------------------------------------------|-------------------------------------------------------------------------------------------------|-------------|----------|--------------------------------|-------------------------|
| <b>ABCB6</b>   | ATP-binding cassette, sub-family B (MDR/TAP), member 6 (Langereis blood group) | Integral component of mitochondrial outer membrane                                              | 2,541       | 4,28E-05 | 5,90E-04                       | Up-Regulated            |
| <b>ABCC1</b>   | ATP-binding cassette, sub-family C (CFTR/MRP), member 1                        | Atpase activity, coupled to transmembrane movement of substances                                | 3,132       | 4,94E-10 | 6,17E-08                       | Up-Regulated            |
| <b>ACOT11</b>  | Acyl-coa thioesterase 11                                                       | Carboxylic ester hydrolase activity                                                             | 3,973       | 2,58E-04 | 2,42E-03                       | Up-Regulated            |
| <b>ADAM10</b>  | ADAM metallopeptidase domain 10                                                | PMA-inducible membrane protein ectodomain proteolysis                                           | 3,425       | 1,33E-04 | 1,44E-03                       | Up-Regulated            |
| <b>ADAM8</b>   | ADAM metallopeptidase domain 8                                                 | Positive regulation of tumor necrosis factor (ligand) superfamily member 11 production          | 3,417       | 1,42E-13 | 6,74E-11                       | Up-Regulated            |
| <b>ADAMTS4</b> | ADAM metallopeptidase with thrombospondin type 1 motif, 4                      | Proteinaceous extracellular matrix                                                              | 2,134       | 2,49E-08 | 1,52E-06                       | Up-Regulated            |
| <b>ADH4</b>    | Alcohol dehydrogenase 4 (class II), pi polypeptide                             | Oxidoreductase activity, acting on the aldehyde or oxo group of donors, NAD or NADP as acceptor | -2,657      | 4,44E-05 | 6,04E-04                       | Down-Regulated          |
| <b>ADORA2B</b> | Adenosine A2b receptor                                                         | Positive regulation of chronic inflammatory response to non-antigenic stimulus                  | 2,056       | 1,95E-05 | 3,22E-04                       | Up-Regulated            |
| <b>AK4</b>     | Adenylate kinase 4                                                             | Nucleoside triphosphate adenylate kinase activity                                               | 2,074       | 1,96E-08 | 1,25E-06                       | Up-Regulated            |
| <b>ALCAM</b>   | Activated leukocyte cell adhesion molecule                                     | External side of plasma membrane                                                                | 2,575       | 5,08E-12 | 1,38E-09                       | Up-Regulated            |
| <b>ANLN</b>    | Anillin, actin binding protein                                                 | Hematopoietic progenitor cell differentiation                                                   | 2,981       | 1,65E-07 | 6,90E-06                       | Up-Regulated            |
| <b>AOAH</b>    | Acyloxyacyl hydrolase (neutrophil)                                             | Acyloxyacyl hydrolase activity                                                                  | 2,388       | 2,34E-06 | 5,68E-05                       | Up-Regulated            |
| <b>APLN</b>    | Apelin                                                                         | Positive regulation of corticotropin-releasing hormone secretion                                | 4,238       | 2,53E-08 | 1,52E-06                       | Up-Regulated            |
| <b>APOBR</b>   | Apolipoprotein B receptor                                                      | Very-low-density lipoprotein particle receptor activity                                         | 3,469       | 5,03E-11 | 9,14E-09                       | Up-Regulated            |
| <b>AQP4</b>    | Aquaporin 4                                                                    | Multicellular organismal water homeostasis                                                      | -2,236      | 1,10E-06 | 3,10E-05                       | Down-Regulated          |

|                 |                                                                      |                                                                                                                                                              |        |          |          |                |
|-----------------|----------------------------------------------------------------------|--------------------------------------------------------------------------------------------------------------------------------------------------------------|--------|----------|----------|----------------|
| <b>AQP9</b>     | Aquaporin 9                                                          | Pyrimidine nucleobase transmembrane transporter activity                                                                                                     | 3,773  | 8,71E-08 | 4,21E-06 | Up-Regulated   |
| <b>ARG1</b>     | Arginase 1                                                           | Cellular response to transforming growth factor beta stimulus                                                                                                | 4,363  | 1,46E-09 | 1,49E-07 | Up-Regulated   |
| <b>ARHGAP25</b> | Rho gtpase activating protein 25                                     | Regulation of small gtpase mediated signal transduction                                                                                                      | 2,275  | 2,28E-09 | 2,21E-07 | Up-Regulated   |
| <b>ART3</b>     | ADP-ribosyltransferase 3                                             | NAD(P)+-protein-arginine ADP-ribosyltransferase activity                                                                                                     | -2,691 | 5,08E-08 | 2,68E-06 | Down-Regulated |
| <b>ASB5</b>     | Ankyrin repeat and SOCS box containing 5                             | Intracellular signal transduction                                                                                                                            | 5,114  | 5,83E-11 | 1,04E-08 | Up-Regulated   |
| <b>ASPM</b>     | Asp (abnormal spindle) homolog, microcephaly associated (Drosophila) | Positive regulation of canonical Wnt signaling pathway                                                                                                       | 3,715  | 1,08E-09 | 1,16E-07 | Up-Regulated   |
| <b>ATP6V0D2</b> | Atpase, H+ transporting, lysosomal 38kda, V0 subunit d2              | Vacuolar proton-transporting V-type atpase complex                                                                                                           | 5,247  | 1,19E-15 | 2,38E-12 | Up-Regulated   |
| <b>ATP6V1A</b>  | Atpase, H+ transporting, lysosomal 70kda, V1 subunit A               | Proton-transporting atpase activity, rotational mechanism                                                                                                    | 2,036  | 1,04E-09 | 1,15E-07 | Up-Regulated   |
| <b>ATP8B4</b>   | Atpase, class I, type 8B, member 4                                   | Phospholipid-translocating atpase activity                                                                                                                   | 2,028  | 3,58E-08 | 2,03E-06 | Up-Regulated   |
| <b>AURKB</b>    | Aurora kinase B                                                      | Anaphase-promoting complex-dependent proteasomal ubiquitin-dependent protein catabolic process                                                               | 3,068  | 1,52E-05 | 2,64E-04 | Up-Regulated   |
| <b>B3GALNT1</b> | Beta-1,3-N-acetylgalactosaminyltransferase 1 (globoside blood group) | Galactosylgalactosylglucosylceramide beta-D-acetylgalactosaminyltransferase activity                                                                         | 2,588  | 2,05E-05 | 3,34E-04 | Up-Regulated   |
| <b>BANK1</b>    | B-cell scaffold protein with ankyrin repeats 1                       | Negative regulation of protein kinase B signaling                                                                                                            | 2,906  | 6,26E-09 | 5,01E-07 | Up-Regulated   |
| <b>BASP1</b>    | Brain abundant, membrane attached signal protein 1                   | Positive regulation of metanephric ureteric bud development                                                                                                  | 2,576  | 4,77E-10 | 6,11E-08 | Up-Regulated   |
| <b>BATF</b>     | Basic leucine zipper transcription factor, ATF-like                  | RNA polymerase II core promoter proximal region sequence-specific DNA binding transcription factor activity involved in positive regulation of transcription | 2,041  | 1,23E-04 | 1,35E-03 | Up-Regulated   |
| <b>BCL2L15</b>  | BCL2-like 15                                                         | Apoptotic process                                                                                                                                            | 2,39   | 2,79E-04 | 2,57E-03 | Up-Regulated   |
| <b>BLK</b>      | BLK proto-oncogene, Src family tyrosine kinase                       | Transmembrane receptor protein tyrosine kinase signaling pathway                                                                                             | 3,377  | 1,91E-05 | 3,16E-04 | Up-Regulated   |
| <b>BUB1</b>     | BUB1 mitotic checkpoint serine/threonine kinase                      | Positive regulation of intrinsic apoptotic signaling pathway                                                                                                 | 2,613  | 2,96E-05 | 4,43E-04 | Up-Regulated   |

|                 |                                                    |                                                                                                                  |        |          |          |                |
|-----------------|----------------------------------------------------|------------------------------------------------------------------------------------------------------------------|--------|----------|----------|----------------|
| <b>BUB1B</b>    | BUB1 mitotic checkpoint serine/threonine kinase B  | Anaphase-promoting complex-dependent proteasomal ubiquitin-dependent protein catabolic process                   | 2,989  | 1,34E-08 | 9,08E-07 | Up-Regulated   |
| <b>C11orf16</b> | Chromosome 11 open reading frame 16                | Unknown                                                                                                          | 2,305  | 1,14E-07 | 5,16E-06 | Up-Regulated   |
| <b>C12orf40</b> | Chromosome 12 open reading frame 40                | Protein binding                                                                                                  | -2,078 | 1,46E-04 | 1,55E-03 | Down-Regulated |
| <b>C1orf162</b> | Chromosome 1 open reading frame 162                | Integral component of membrane                                                                                   | 2,949  | 3,55E-08 | 2,03E-06 | Up-Regulated   |
| <b>C1orf228</b> | Chromosome 1 open reading frame 228                | Unknown                                                                                                          | 3,692  | 3,18E-08 | 1,86E-06 | Up-Regulated   |
| <b>C4orf47</b>  | Chromosome 4 open reading frame 47                 | Centrosome                                                                                                       | 2,351  | 5,23E-06 | 1,10E-04 | Up-Regulated   |
| <b>CA2</b>      | Carbonic anhydrase II                              | Positive regulation of dipeptide transmembrane transport                                                         | 5,324  | 2,67E-14 | 2,14E-11 | Up-Regulated   |
| <b>CA9</b>      | Carbonic anhydrase IX                              | Regulation of transcription from RNA polymerase II promoter in response to hypoxia                               | 2,045  | 2,16E-06 | 5,30E-05 | Up-Regulated   |
| <b>CAPG</b>     | Capping protein (actin filament), gelsolin-like    | Positive regulation of podosome assembly                                                                         | 2,042  | 2,38E-07 | 9,24E-06 | Up-Regulated   |
| <b>CASC5</b>    | Cancer susceptibility candidate 5                  | Attachment of spindle microtubules to kinetochore                                                                | 2,901  | 1,95E-05 | 3,22E-04 | Up-Regulated   |
| <b>CCDC68</b>   | Coiled-coil domain containing 68                   | Protein binding                                                                                                  | -2,216 | 5,51E-06 | 1,14E-04 | Down-Regulated |
| <b>CCL20</b>    | Chemokine (C-C motif) ligand 20                    | Positive regulation of nitric-oxide synthase biosynthetic process                                                | 2,926  | 3,64E-07 | 1,35E-05 | Up-Regulated   |
| <b>CCL4</b>     | Chemokine (C-C motif) ligand 4                     | Positive regulation of natural killer cell chemotaxis                                                            | 2,307  | 1,99E-06 | 4,97E-05 | Up-Regulated   |
| <b>CCL5</b>     | Chemokine (C-C motif) ligand 5                     | Negative regulation of G-protein coupled receptor protein signaling pathway                                      | 4,023  | 2,98E-10 | 4,26E-08 | Up-Regulated   |
| <b>CCNB1</b>    | Cyclin B1                                          | Positive regulation of ubiquitin-protein ligase activity involved in regulation of mitotic cell cycle transition | 2,835  | 4,02E-07 | 1,45E-05 | Up-Regulated   |
| <b>CCNB2</b>    | Cyclin B2                                          | G2/M transition of mitotic cell cycle                                                                            | 3,617  | 6,36E-07 | 2,04E-05 | Up-Regulated   |
| <b>CCR1</b>     | Chemokine (C-C motif) receptor 1                   | G-protein coupled receptor signaling pathway, coupled to cyclic nucleotide second messenger                      | 4,059  | 7,57E-14 | 4,02E-11 | Up-Regulated   |
| <b>CCR5</b>     | Chemokine (C-C motif) receptor 5 (gene/pseudogene) | Release of sequestered calcium ion into cytosol by sarcoplasmic reticulum                                        | 2,797  | 8,41E-11 | 1,42E-08 | Up-Regulated   |

|              |                                                |                                                                                                                  |       |          |          |              |
|--------------|------------------------------------------------|------------------------------------------------------------------------------------------------------------------|-------|----------|----------|--------------|
| <b>CCR8</b>  | Chemokine (C-C motif) receptor 8               | Positive regulation of cytosolic calcium ion concentration                                                       | 3,355 | 4,70E-04 | 3,86E-03 | Up-Regulated |
| <b>CCRL2</b> | Chemokine (C-C motif) receptor-like 2          | G-protein coupled receptor signaling pathway                                                                     | 3,088 | 5,46E-06 | 1,13E-04 | Up-Regulated |
| <b>CD101</b> | CD101 molecule                                 | Hydrolase activity, acting on carbon-nitrogen (but not peptide) bonds, in cyclic amides                          | 2,892 | 4,71E-06 | 1,01E-04 | Up-Regulated |
| <b>CD14</b>  | CD14 molecule                                  | Activation of cysteine-type endopeptidase activity involved in apoptotic signaling pathway                       | 2,059 | 1,68E-05 | 2,85E-04 | Up-Regulated |
| <b>CD163</b> | CD163 molecule                                 | Integral component of plasma membrane                                                                            | 2,478 | 6,36E-06 | 1,28E-04 | Up-Regulated |
| <b>CD19</b>  | CD19 molecule                                  | Positive regulation of release of sequestered calcium ion into cytosol                                           | 2,589 | 2,83E-04 | 2,59E-03 | Up-Regulated |
| <b>CD1C</b>  | CD1c molecule                                  | Antigen processing and presentation, exogenous lipid antigen via MHC class Ib                                    | 2,843 | 6,48E-08 | 3,25E-06 | Up-Regulated |
| <b>CD27</b>  | CD27 molecule                                  | Negative regulation of cysteine-type endopeptidase activity involved in apoptotic process                        | 2,146 | 1,24E-05 | 2,21E-04 | Up-Regulated |
| <b>CD38</b>  | CD38 molecule                                  | Positive regulation of cytosolic calcium ion concentration                                                       | 2,384 | 9,01E-06 | 1,71E-04 | Up-Regulated |
| <b>CD48</b>  | CD48 molecule                                  | Integral component of plasma membrane                                                                            | 2,297 | 8,12E-09 | 6,19E-07 | Up-Regulated |
| <b>CD53</b>  | CD53 molecule                                  | Positive regulation of myoblast fusion                                                                           | 2,295 | 4,80E-07 | 1,65E-05 | Up-Regulated |
| <b>CD68</b>  | CD68 molecule                                  | Cellular response to organic substance                                                                           | 2,852 | 6,07E-09 | 4,89E-07 | Up-Regulated |
| <b>CD69</b>  | CD69 molecule                                  | Transmembrane signaling receptor activity                                                                        | 2,086 | 1,87E-04 | 1,88E-03 | Up-Regulated |
| <b>CD72</b>  | CD72 molecule                                  | Transmembrane signaling receptor activity                                                                        | 4,449 | 1,11E-11 | 2,58E-09 | Up-Regulated |
| <b>CD79B</b> | CD79b molecule, immunoglobulin-associated beta | Transmembrane signaling receptor activity                                                                        | 2,731 | 2,67E-05 | 4,13E-04 | Up-Regulated |
| <b>CD84</b>  | CD84 molecule                                  | Homophilic cell adhesion via plasma membrane adhesion molecules                                                  | 2,222 | 5,36E-07 | 1,77E-05 | Up-Regulated |
| <b>CDA</b>   | Cytidine deaminase                             | Nucleobase-containing small molecule metabolic process                                                           | 2,095 | 4,82E-08 | 2,60E-06 | Up-Regulated |
| <b>CDC20</b> | Cell division cycle 20                         | Positive regulation of ubiquitin-protein ligase activity involved in regulation of mitotic cell cycle transition | 2,244 | 6,07E-05 | 7,67E-04 | Up-Regulated |

|               |                                                |                                                                                                                  |        |          |          |                |
|---------------|------------------------------------------------|------------------------------------------------------------------------------------------------------------------|--------|----------|----------|----------------|
| <b>CDCA2</b>  | Cell division cycle associated 2               | Positive regulation of protein dephosphorylation                                                                 | 2,411  | 6,72E-05 | 8,36E-04 | Up-Regulated   |
| <b>CDCA7</b>  | Cell division cycle associated 7               | Regulation of transcription, DNA-templated                                                                       | 3,452  | 1,43E-05 | 2,50E-04 | Up-Regulated   |
| <b>CDH18</b>  | Cadherin 18, type 2                            | Homophilic cell adhesion via plasma membrane adhesion molecules                                                  | -2,039 | 1,72E-04 | 1,77E-03 | Down-Regulated |
| <b>CDH19</b>  | Cadherin 19, type 2                            | Calcium-dependent cell-cell adhesion via plasma membrane cell adhesion molecules                                 | -2,025 | 9,47E-06 | 1,78E-04 | Down-Regulated |
| <b>CDK1</b>   | Cyclin-dependent kinase 1                      | Positive regulation of ubiquitin-protein ligase activity involved in regulation of mitotic cell cycle transition | 2,666  | 4,48E-07 | 1,57E-05 | Up-Regulated   |
| <b>CELSR3</b> | Cadherin, EGF LAG seven-pass G-type receptor 3 | Homophilic cell adhesion via plasma membrane adhesion molecules                                                  | 2,031  | 3,61E-05 | 5,19E-04 | Up-Regulated   |
| <b>CENPA</b>  | Centromere protein A                           | Protein localization to chromosome, centromeric region                                                           | 3,417  | 5,63E-07 | 1,84E-05 | Up-Regulated   |
| <b>CENPE</b>  | Centromere protein E, 312kda                   | Antigen processing and presentation of exogenous peptide antigen via MHC class II                                | 3,006  | 4,88E-06 | 1,03E-04 | Up-Regulated   |
| <b>CENPF</b>  | Centromere protein F, 350/400kda               | Negative regulation of transcription, DNA-templated                                                              | 2,959  | 6,77E-06 | 1,35E-04 | Up-Regulated   |
| <b>CEP55</b>  | Centrosomal protein 55kda                      | Establishment of protein localization                                                                            | 3,098  | 2,71E-06 | 6,44E-05 | Up-Regulated   |
| <b>CERKL</b>  | Ceramide kinase-like                           | Negative regulation of apoptotic process                                                                         | 2,374  | 8,82E-08 | 4,23E-06 | Up-Regulated   |
| <b>CHI3L1</b> | Chitinase 3-like 1 (cartilage glycoprotein-39) | Positive regulation of peptidyl-threonine phosphorylation                                                        | 5,602  | 1,11E-17 | 1,10E-13 | Up-Regulated   |
| <b>CHI3L2</b> | Chitinase 3-like 2                             | Carbohydrate metabolic process                                                                                   | 2,777  | 8,73E-06 | 1,66E-04 | Up-Regulated   |
| <b>CHIT1</b>  | Chitinase 1 (chitotriosidase)                  | Polysaccharide catabolic process                                                                                 | 4,887  | 6,77E-12 | 1,76E-09 | Up-Regulated   |
| <b>CKS2</b>   | CDC28 protein kinase regulatory subunit 2      | Regulation of cyclin-dependent protein serine/threonine kinase activity                                          | 3,33   | 1,86E-08 | 1,20E-06 | Up-Regulated   |
| <b>CLDN19</b> | Claudin 19                                     | Calcium-independent cell-cell adhesion via plasma membrane cell-adhesion molecules                               | -2,28  | 3,53E-04 | 3,06E-03 | Down-Regulated |
| <b>CLEC4A</b> | C-type lectin domain family 4, member A        | Stimulatory C-type lectin receptor signaling pathway                                                             | 3,273  | 1,56E-11 | 3,40E-09 | Up-Regulated   |
| <b>CLEC4D</b> | C-type lectin domain family 4, member D        | Stimulatory C-type lectin receptor signaling pathway                                                             | 4,201  | 8,63E-15 | 1,02E-11 | Up-Regulated   |
| <b>CLEC4E</b> | C-type lectin domain family 4, member E        | Stimulatory C-type lectin receptor signaling                                                                     | 3,776  | 2,30E-17 | 1,15E-13 | Up-            |

|               |                                                                                   | pathway                                                                                           |        |          |          | Regulated      |
|---------------|-----------------------------------------------------------------------------------|---------------------------------------------------------------------------------------------------|--------|----------|----------|----------------|
| <b>CLEC9A</b> | C-type lectin domain family 9, member A                                           | Positive regulation of cytokine secretion                                                         | 2,474  | 1,53E-04 | 1,61E-03 | Up-Regulated   |
| <b>CLIP4</b>  | CAP-GLY domain containing linker protein family, member 4                         | Negative regulation of T cell receptor signaling pathway                                          | -2,572 | 6,89E-08 | 3,44E-06 | Down-Regulated |
| <b>CLSTN2</b> | Calsyntenin 2                                                                     | Homophilic cell adhesion via plasma membrane adhesion molecules                                   | 4,223  | 2,43E-10 | 3,63E-08 | Up-Regulated   |
| <b>CNR2</b>   | Cannabinoid receptor 2 (macrophage)                                               | G-protein coupled receptor signaling pathway, coupled to cyclic nucleotide second messenger       | 2,199  | 3,56E-04 | 3,08E-03 | Up-Regulated   |
| <b>COCH</b>   | Cochlin                                                                           | Positive regulation of innate immune response                                                     | 2,861  | 4,37E-08 | 2,44E-06 | Up-Regulated   |
| <b>CPA5</b>   | Carboxypeptidase A5                                                               | Metalloprotease activity                                                                          | 3,777  | 2,89E-14 | 2,14E-11 | Up-Regulated   |
| <b>CPPED1</b> | Calcineurin-like phosphoesterase domain containing 1                              | Phosphoprotein phosphatase activity                                                               | 2,068  | 9,46E-13 | 3,63E-10 | Up-Regulated   |
| <b>CPVL</b>   | Carboxypeptidase, vitellogenic-like                                               | Serine-type carboxypeptidase activity                                                             | 2,233  | 1,14E-06 | 3,17E-05 | Up-Regulated   |
| <b>CSF2RB</b> | Colony stimulating factor 2 receptor, beta, low-affinity (granulocyte-macrophage) | Granulocyte macrophage colony-stimulating factor receptor complex                                 | 2,367  | 3,05E-06 | 7,14E-05 | Up-Regulated   |
| <b>CTSB</b>   | Cathepsin B                                                                       | Proteolysis involved in cellular protein catabolic process                                        | 2,15   | 1,77E-08 | 1,15E-06 | Up-Regulated   |
| <b>CTSE</b>   | Cathepsin E                                                                       | Antigen processing and presentation of exogenous peptide antigen via MHC class II                 | 4,164  | 2,35E-14 | 2,14E-11 | Up-Regulated   |
| <b>CTSS</b>   | Cathepsin S                                                                       | Antigen processing and presentation of exogenous peptide antigen via MHC class I, TAP-independent | 2,432  | 2,67E-09 | 2,51E-07 | Up-Regulated   |
| <b>CTSV</b>   | Cathepsin V                                                                       | Antigen processing and presentation of exogenous peptide antigen via MHC class II                 | 2,803  | 3,38E-11 | 6,49E-09 | Up-Regulated   |
| <b>CXCL11</b> | Chemokine (C-X-C motif) ligand 11                                                 | Positive regulation of release of sequestered calcium ion into cytosol                            | 2,203  | 2,11E-05 | 3,43E-04 | Up-Regulated   |
| <b>CXCL13</b> | Chemokine (C-X-C motif) ligand 13                                                 | Negative regulation of endothelial cell chemotaxis to fibroblast growth factor                    | 6,286  | 9,57E-14 | 4,78E-11 | Up-Regulated   |
| <b>CXCL13</b> | Chemokine (C-X-C motif) ligand 13                                                 | Negative regulation of endothelial cell chemotaxis to fibroblast growth factor                    | 2,92   | 1,34E-06 | 3,67E-05 | Up-Regulated   |
| <b>CXCL13</b> | Chemokine (C-X-C motif) ligand 13                                                 | Negative regulation of endothelial cell chemotaxis to fibroblast growth factor                    | 2,471  | 3,65E-06 | 8,11E-05 | Up-Regulated   |
| <b>CXCL13</b> | Chemokine (C-X-C motif) ligand 13                                                 | Negative regulation of endothelial cell                                                           | 6,49   | 5,49E-09 | 4,53E-07 | Up-            |

|                |                                                        |                                                                                                                                                                                             |        |          |          |                |
|----------------|--------------------------------------------------------|---------------------------------------------------------------------------------------------------------------------------------------------------------------------------------------------|--------|----------|----------|----------------|
|                |                                                        | chemotaxis to fibroblast growth factor                                                                                                                                                      |        |          |          | Regulated      |
| <b>CXCL8</b>   | Chemokine (C-X-C motif) ligand 8                       | Regulation of single stranded viral RNA replication via double stranded DNA intermediate                                                                                                    | 5,463  | 2,09E-10 | 3,21E-08 | Up-Regulated   |
| <b>CXCR4</b>   | Chemokine (C-X-C motif) receptor 4                     | Positive regulation of cytosolic calcium ion concentration                                                                                                                                  | 3,211  | 9,02E-10 | 1,01E-07 | Up-Regulated   |
| <b>CYBB</b>    | Cytochrome b-245, beta polypeptide                     | Antigen processing and presentation of exogenous peptide antigen via MHC class I, TAP-dependent                                                                                             | 2,643  | 3,20E-09 | 2,95E-07 | Up-Regulated   |
| <b>CYP2D6</b>  | Cytochrome P450, family 2, subfamily D, polypeptide 6  | Oxidoreductase activity, acting on paired donors, with incorporation or reduction of molecular oxygen, reduced flavin or flavoprotein as one donor, and incorporation of one atom of oxygen | -2,991 | 4,23E-06 | 9,28E-05 | Down-Regulated |
| <b>DAPL1</b>   | Death associated protein-like 1                        | Cellular response to amino acid starvation                                                                                                                                                  | -3,922 | 2,45E-12 | 7,41E-10 | Down-Regulated |
| <b>DCHS2</b>   | Dachsous cadherin-related 2                            | Homophilic cell adhesion via plasma membrane adhesion molecules                                                                                                                             | -2,599 | 3,27E-08 | 1,89E-06 | Down-Regulated |
| <b>DCSTAMP</b> | Dendrocyte expressed seven transmembrane protein       | Cellular response to macrophage colony-stimulating factor stimulus                                                                                                                          | 5,363  | 3,91E-10 | 5,43E-08 | Up-Regulated   |
| <b>DDIAS</b>   | DNA damage-induced apoptosis suppressor                | Negative regulation of fibroblast apoptotic process                                                                                                                                         | 2,475  | 4,89E-07 | 1,67E-05 | Up-Regulated   |
| <b>DEPDC1B</b> | DEP domain containing 1B                               | Regulation of small gtpase mediated signal transduction                                                                                                                                     | 2,134  | 7,09E-05 | 8,74E-04 | Up-Regulated   |
| <b>DHRS9</b>   | Dehydrogenase/reductase (SDR family) member 9          | Integral component of endoplasmic reticulum membrane                                                                                                                                        | 3,533  | 1,41E-09 | 1,45E-07 | Up-Regulated   |
| <b>DKK3</b>    | Dickkopf WNT signaling pathway inhibitor 3             | Negative regulation of aldosterone biosynthetic process                                                                                                                                     | -2,125 | 2,65E-09 | 2,51E-07 | Down-Regulated |
| <b>DLGAP5</b>  | Discs, large (Drosophila) homolog-associated protein 5 | Positive regulation of mitotic metaphase/anaphase transition                                                                                                                                | 3,329  | 9,92E-08 | 4,61E-06 | Up-Regulated   |
| <b>DOK3</b>    | Docking protein 3                                      | Ras protein signal transduction                                                                                                                                                             | 2,136  | 1,69E-06 | 4,41E-05 | Up-Regulated   |
| <b>DRP2</b>    | Dystrophin related protein 2                           | Nucleobase-containing compound metabolic process                                                                                                                                            | -2,492 | 8,65E-06 | 1,66E-04 | Down-Regulated |
| <b>DSC2</b>    | Desmocollin 2                                          | Cell adhesive protein binding involved in bundle of His cell-Purkinje myocyte communication                                                                                                 | -2,182 | 1,46E-06 | 3,92E-05 | Down-Regulated |
| <b>DSG2</b>    | Desmoglein 2                                           | Cell adhesive protein binding involved in                                                                                                                                                   | 3,073  | 5,42E-06 | 1,12E-04 | Up-            |

|                |                                                    |                                                                                                                                                                                                   |        |          |          |                |
|----------------|----------------------------------------------------|---------------------------------------------------------------------------------------------------------------------------------------------------------------------------------------------------|--------|----------|----------|----------------|
|                |                                                    | bundle of His cell-Purkinje myocyte communication                                                                                                                                                 |        |          |          | Regulated      |
| <b>DSP</b>     | Desmoplakin                                        | Cell adhesive protein binding involved in bundle of His cell-Purkinje myocyte communication                                                                                                       | -2,382 | 5,40E-07 | 1,78E-05 | Down-Regulated |
| <b>DUSP5</b>   | Dual specificity phosphatase 5                     | MAP kinase tyrosine/serine/threonine phosphatase activity                                                                                                                                         | 2,151  | 1,84E-07 | 7,46E-06 | Up-Regulated   |
| <b>E2F1</b>    | E2F transcription factor 1                         | Positive regulation of protein insertion into mitochondrial membrane involved in apoptotic signaling pathway                                                                                      | 2,147  | 3,23E-05 | 4,75E-04 | Up-Regulated   |
| <b>E2F8</b>    | E2F transcription factor 8                         | RNA polymerase II core promoter proximal region sequence-specific DNA binding transcription factor activity involved in negative regulation of transcription                                      | 2,332  | 1,35E-04 | 1,46E-03 | Up-Regulated   |
| <b>ECT2</b>    | Epithelial cell transforming 2                     | Regulation of attachment of spindle microtubules to kinetochore                                                                                                                                   | 3,077  | 7,67E-07 | 2,34E-05 | Up-Regulated   |
| <b>EGLN3</b>   | Egl-9 family hypoxia-inducible factor 3            | Oxidoreductase activity, acting on paired donors, with incorporation or reduction of molecular oxygen, 2-oxoglutarate as one donor, and incorporation of one atom each of oxygen into both donors | 4,415  | 9,82E-12 | 2,39E-09 | Up-Regulated   |
| <b>EMILIN2</b> | Elastin microfibril interfacier 2                  | Extracellular matrix constituent conferring elasticity                                                                                                                                            | 2,493  | 1,80E-08 | 1,17E-06 | Up-Regulated   |
| <b>ENO2</b>    | Enolase 2 (gamma, neuronal)                        | Phosphopyruvate hydratase activity                                                                                                                                                                | 3,632  | 9,22E-15 | 1,02E-11 | Up-Regulated   |
| <b>EPCAM</b>   | Epithelial cell adhesion molecule                  | Positive regulation of transcription from RNA polymerase II promoter                                                                                                                              | 2,012  | 3,20E-06 | 7,36E-05 | Up-Regulated   |
| <b>EPHA6</b>   | EPH receptor A6                                    | Integral component of plasma membrane                                                                                                                                                             | -2,681 | 6,10E-06 | 1,24E-04 | Down-Regulated |
| <b>EPHX4</b>   | Epoxide hydrolase 4                                | Integral component of membrane                                                                                                                                                                    | 2,876  | 4,31E-09 | 3,69E-07 | Up-Regulated   |
| <b>EPX</b>     | Eosinophil peroxidase                              | Negative regulation of interleukin-10 production                                                                                                                                                  | -2,128 | 3,95E-04 | 3,34E-03 | Down-Regulated |
| <b>ERBB3</b>   | Erb-b2 receptor tyrosine kinase 3                  | Transmembrane receptor protein tyrosine kinase signaling pathway                                                                                                                                  | -2,192 | 2,01E-07 | 8,09E-06 | Down-Regulated |
| <b>ERCC6L</b>  | Excision repair cross-complementation group 6-like | Small gtpase mediated signal transduction                                                                                                                                                         | 2,505  | 1,37E-05 | 2,41E-04 | Up-Regulated   |
| <b>ERO1L</b>   | ERO1-like (S. Cerevisiae)                          | Oxidoreductase activity, acting on a sulfur                                                                                                                                                       | 2,47   | 7,94E-11 | 1,37E-08 | Up-            |



|                |                                                                  |                                                                                                                                                              |        |          |          |                |
|----------------|------------------------------------------------------------------|--------------------------------------------------------------------------------------------------------------------------------------------------------------|--------|----------|----------|----------------|
|                |                                                                  | group of donors, disulfide as acceptor                                                                                                                       |        |          |          | Regulated      |
| <b>ESCO2</b>   | Establishment of sister chromatid cohesion N-acetyltransferase 2 | Lysine N-acetyltransferase activity, acting on acetyl phosphate as donor                                                                                     | 2,366  | 3,58E-04 | 3,09E-03 | Up-Regulated   |
| <b>ETV4</b>    | Ets variant 4                                                    | RNA polymerase II core promoter proximal region sequence-specific DNA binding transcription factor activity involved in positive regulation of transcription | 2,198  | 5,31E-05 | 6,91E-04 | Up-Regulated   |
| <b>EVI2B</b>   | Ecotropic viral integration site 2B                              | Integral component of plasma membrane                                                                                                                        | 2,132  | 7,67E-07 | 2,34E-05 | Up-Regulated   |
| <b>EXO1</b>    | Exonuclease 1                                                    | Humoral immune response mediated by circulating immunoglobulin                                                                                               | 2,993  | 3,09E-06 | 7,19E-05 | Up-Regulated   |
| <b>F3</b>      | Coagulation factor III (thromboplastin, tissue factor)           | Activation of cysteine-type endopeptidase activity involved in apoptotic process                                                                             | -2,058 | 1,09E-08 | 7,74E-07 | Down-Regulated |
| <b>FABP5</b>   | Fatty acid binding protein 5 (psoriasis-associated)              | Phosphatidylcholine biosynthetic process                                                                                                                     | 3,9    | 6,86E-14 | 4,02E-11 | Up-Regulated   |
| <b>FADS1</b>   | Fatty acid desaturase 1                                          | Unsaturated fatty acid biosynthetic process                                                                                                                  | 2,073  | 1,37E-04 | 1,47E-03 | Up-Regulated   |
| <b>FADS1</b>   | Fatty acid desaturase 1                                          | Unsaturated fatty acid biosynthetic process                                                                                                                  | 2,138  | 3,32E-06 | 7,55E-05 | Up-Regulated   |
| <b>FAIM2</b>   | Fas apoptotic inhibitory molecule 2                              | Negative regulation of apoptotic signaling pathway                                                                                                           | 2,91   | 9,48E-04 | 6,85E-03 | Up-Regulated   |
| <b>FAIM3</b>   | Fas apoptotic inhibitory molecule 3                              | Negative regulation of apoptotic process                                                                                                                     | 2,952  | 2,35E-04 | 2,25E-03 | Up-Regulated   |
| <b>FAM150A</b> | Family with sequence similarity 150, member A                    | Extracellular region                                                                                                                                         | -2,532 | 3,46E-05 | 5,01E-04 | Down-Regulated |
| <b>FAM46C</b>  | Family with sequence similarity 46, member C                     | Protein binding                                                                                                                                              | 2,024  | 1,25E-05 | 2,22E-04 | Up-Regulated   |
| <b>FBP1</b>    | Fructose-1,6-bisphosphatase 1                                    | Negative regulation of Ras protein signal transduction                                                                                                       | 2,021  | 3,45E-04 | 3,02E-03 | Up-Regulated   |
| <b>FCRL1</b>   | Fc receptor-like 1                                               | Integral component of membrane                                                                                                                               | 3,566  | 2,64E-04 | 2,46E-03 | Up-Regulated   |
| <b>FCRL3</b>   | Fc receptor-like 3                                               | Integral component of membrane                                                                                                                               | 2,054  | 5,07E-05 | 6,66E-04 | Up-Regulated   |
| <b>FCRLA</b>   | Fc receptor-like A                                               | Cell differentiation                                                                                                                                         | 3,344  | 2,09E-04 | 2,06E-03 | Up-Regulated   |
| <b>FGF23</b>   | Fibroblast growth factor 23                                      | Positive regulation of MAPKKK cascade by fibroblast growth factor receptor signaling pathway                                                                 | 7,423  | 9,83E-12 | 2,39E-09 | Up-Regulated   |

|               |                                                                       |                                                                                                                 |        |          |          |                |
|---------------|-----------------------------------------------------------------------|-----------------------------------------------------------------------------------------------------------------|--------|----------|----------|----------------|
| <b>FGF7</b>   | Fibroblast growth factor 7                                            | Regulation of branching involved in salivary gland morphogenesis by mesenchymal-epithelial signaling            | 2,551  | 3,25E-08 | 1,89E-06 | Up-Regulated   |
| <b>FGL1</b>   | Fibrinogen-like 1                                                     | Extracellular exosome                                                                                           | 3,707  | 4,16E-06 | 9,14E-05 | Up-Regulated   |
| <b>FLVCR2</b> | Feline leukemia virus subgroup C cellular receptor family, member 2   | Integral component of membrane                                                                                  | 2,29   | 2,52E-06 | 6,03E-05 | Up-Regulated   |
| <b>FMN1</b>   | Formin 1                                                              | Microtubule binding                                                                                             | 2,028  | 1,43E-05 | 2,50E-04 | Up-Regulated   |
| <b>FNTB</b>   | Farnesyltransferase, CAAX box, beta                                   | Positive regulation of nitric-oxide synthase biosynthetic process                                               | 2,317  | 7,65E-14 | 4,02E-11 | Up-Regulated   |
| <b>FOLR2</b>  | Folate receptor 2 (fetal)                                             | Regulation of thymidylate synthase biosynthetic process                                                         | 2,325  | 7,52E-06 | 1,48E-04 | Up-Regulated   |
| <b>FOXM1</b>  | Forkhead box M1                                                       | DNA damage response, signal transduction by p53 class mediator resulting in transcription of p21 class mediator | 2,688  | 9,37E-06 | 1,77E-04 | Up-Regulated   |
| <b>FRMPD1</b> | FERM and PDZ domain containing 1                                      | Extracellular exosome                                                                                           | -2,298 | 9,03E-08 | 4,27E-06 | Down-Regulated |
| <b>FRRS1</b>  | Ferric-chelate reductase 1                                            | Ferric-chelate reductase activity                                                                               | 2,436  | 5,53E-08 | 2,83E-06 | Up-Regulated   |
| <b>FTL</b>    | Ferritin, light polypeptide                                           | Post-Golgi vesicle-mediated transport                                                                           | 3,393  | 4,20E-10 | 5,66E-08 | Up-Regulated   |
| <b>GALNT6</b> | Polypeptide N-acetylgalactosaminyltransferase 6                       | Polypeptide N-acetylgalactosaminyltransferase activity                                                          | 3,685  | 5,19E-10 | 6,39E-08 | Up-Regulated   |
| <b>GAPT</b>   | GRB2-binding adaptor protein, transmembrane                           | Immunoglobulin production involved in immunoglobulin mediated immune response                                   | 2,689  | 6,80E-04 | 5,21E-03 | Up-Regulated   |
| <b>GGH</b>    | Gamma-glutamyl hydrolase (conjugase, foylpolygammaglutamyl hydrolase) | Gamma-glutamyl-peptidase activity                                                                               | 2,62   | 4,43E-08 | 2,44E-06 | Up-Regulated   |
| <b>GLRX</b>   | Glutaredoxin (thioltransferase)                                       | Positive regulation of sodium ion transmembrane transporter activity                                            | 2,955  | 1,78E-06 | 4,55E-05 | Up-Regulated   |
| <b>GPD1</b>   | Glycerol-3-phosphate dehydrogenase 1 (soluble)                        | Glycerol-3-phosphate dehydrogenase [NAD+] activity                                                              | -2,568 | 1,08E-07 | 4,93E-06 | Down-Regulated |
| <b>GPI</b>    | Glucose-6-phosphate isomerase                                         | Negative regulation of cysteine-type endopeptidase activity involved in apoptotic process                       | 2,093  | 1,12E-09 | 1,19E-07 | Up-Regulated   |
| <b>GPMB</b>   | Glycoprotein (transmembrane) nmb                                      | Negative regulation of tumor necrosis factor production                                                         | 2,746  | 2,32E-06 | 5,66E-05 | Up-Regulated   |
| <b>GPR158</b> | G protein-coupled receptor 158                                        | Regulation of G-protein coupled receptor                                                                        | 5,884  | 1,27E-09 | 1,34E-07 | Up-            |

|                |                                                                |                                                                                                                                  |        |          |          |                |
|----------------|----------------------------------------------------------------|----------------------------------------------------------------------------------------------------------------------------------|--------|----------|----------|----------------|
|                |                                                                | protein signaling pathway                                                                                                        |        |          |          | Regulated      |
| <b>GPR171</b>  | G protein-coupled receptor 171                                 | G-protein coupled purinergic nucleotide receptor signaling pathway                                                               | 2,211  | 1,56E-04 | 1,63E-03 | Up-Regulated   |
| <b>GPR18</b>   | G protein-coupled receptor 18                                  | G-protein coupled receptor signaling pathway                                                                                     | 3,07   | 7,58E-09 | 5,83E-07 | Up-Regulated   |
| <b>GPR84</b>   | G protein-coupled receptor 84                                  | Phospholipase C-activating G-protein coupled receptor signaling pathway                                                          | 3,628  | 2,07E-05 | 3,37E-04 | Up-Regulated   |
| <b>GPRC5D</b>  | G protein-coupled receptor, class C, group 5, member D         | G-protein coupled receptor signaling pathway                                                                                     | 2,051  | 1,16E-03 | 8,03E-03 | Up-Regulated   |
| <b>GPRIN3</b>  | GPRIN family member 3                                          | Unknown                                                                                                                          | 2,444  | 6,77E-05 | 8,40E-04 | Up-Regulated   |
| <b>GSG2</b>    | Germ cell associated 2 (haspin)                                | Histone H3-T3 phosphorylation involved in chromosome passenger complex localization to kinetochore                               | 2,477  | 1,71E-04 | 1,77E-03 | Up-Regulated   |
| <b>GTF3C6</b>  | General transcription factor III C, polypeptide 6, alpha 35kda | 5S class rna transcription from RNA polymerase III type 1 promoter                                                               | 4,617  | 6,18E-13 | 2,57E-10 | Up-Regulated   |
| <b>HAAO</b>    | 3-hydroxyanthranilate 3,4-dioxygenase                          | 'De novo' NAD biosynthetic process from tryptophan                                                                               | 2,565  | 3,85E-07 | 1,40E-05 | Up-Regulated   |
| <b>HAS2</b>    | Hyaluronan synthase 2                                          | Positive regulation of substrate adhesion-dependent cell spreading                                                               | 2,676  | 3,13E-11 | 6,24E-09 | Up-Regulated   |
| <b>HAVCR1</b>  | Hepatitis A virus cellular receptor 1                          | Integral component of membrane                                                                                                   | 2,297  | 3,83E-05 | 5,43E-04 | Up-Regulated   |
| <b>HCK</b>     | HCK proto-oncogene, Src family tyrosine kinase                 | Regulation of sequence-specific DNA binding transcription factor activity                                                        | 2,154  | 6,94E-07 | 2,20E-05 | Up-Regulated   |
| <b>HELLS</b>   | Helicase, lymphoid-specific                                    | Methylation-dependent chromatin silencing                                                                                        | 2,417  | 1,22E-07 | 5,38E-06 | Up-Regulated   |
| <b>HHIP</b>    | Hedgehog interacting protein                                   | Oxidoreductase activity, acting on the CH-OH group of donors, quinone or similar compound as acceptor                            | -3,512 | 4,82E-15 | 6,88E-12 | Down-Regulated |
| <b>HILS1</b>   | Histone linker H1 domain, spermatid-specific 1, pseudogene     | Regulation of transcription, DNA-templated                                                                                       | 2,327  | 4,35E-05 | 5,95E-04 | Up-Regulated   |
| <b>HK3</b>     | Hexokinase 3 (white cell)                                      | Early endosome to late endosome transport                                                                                        | 2,099  | 4,66E-05 | 6,27E-04 | Up-Regulated   |
| <b>HLA-DRA</b> | Major histocompatibility complex, class II, DR alpha           | Antigen processing and presentation of peptide or polysaccharide antigen via MHC class II                                        | 2,073  | 2,53E-08 | 1,52E-06 | Up-Regulated   |
| <b>HMGA2</b>   | High mobility group AT-hook 2                                  | RNA polymerase II core promoter proximal region sequence-specific DNA binding transcription factor activity involved in negative | 3,322  | 7,53E-09 | 5,83E-07 | Up-Regulated   |

|                 |                                                        |                                                                                                                                                                |        |          |          |                |
|-----------------|--------------------------------------------------------|----------------------------------------------------------------------------------------------------------------------------------------------------------------|--------|----------|----------|----------------|
|                 |                                                        | regulation of transcription                                                                                                                                    |        |          |          |                |
| <b>HMMR</b>     | Hyaluronan-mediated motility receptor (RHAMM)          | Glycosaminoglycan metabolic process                                                                                                                            | 3,965  | 1,21E-08 | 8,43E-07 | Up-Regulated   |
| <b>HMOX1</b>    | Heme oxygenase 1                                       | Regulation of transcription from RNA polymerase II promoter in response to oxidative stress                                                                    | 4,416  | 5,12E-08 | 2,69E-06 | Up-Regulated   |
| <b>HNMT</b>     | Histamine N-methyltransferase                          | Positive regulation of protein targeting to mitochondrion                                                                                                      | 2,28   | 4,04E-10 | 5,53E-08 | Up-Regulated   |
| <b>HOOK1</b>    | Hook microtubule-tethering protein 1                   | Early endosome to late endosome transport                                                                                                                      | 2,098  | 3,70E-04 | 3,17E-03 | up-Regulated   |
| <b>HRH1</b>     | Histamine receptor H1                                  | Positive regulation of adenylate cyclase activity involved in G-protein coupled receptor signaling pathway                                                     | -2,394 | 7,10E-07 | 2,23E-05 | Down-Regulated |
| <b>HS3ST3B1</b> | Heparan sulfate (glucosamine) 3-O-sulfotransferase 3B1 | Heparan sulfate proteoglycan biosynthetic process, enzymatic modification                                                                                      | 2,026  | 1,55E-04 | 1,63E-03 | Up-Regulated   |
| <b>HSPB3</b>    | Heat shock 27kda protein 3                             | Response to unfolded protein                                                                                                                                   | 2,298  | 2,42E-04 | 2,31E-03 | Up-Regulated   |
| <b>IBSP</b>     | Integrin-binding sialoprotein                          | Cellular response to growth factor stimulus                                                                                                                    | 6,221  | 6,88E-12 | 1,76E-09 | Up-Regulated   |
| <b>ICOS</b>     | Inducible T-cell co-stimulator                         | Integral component of plasma membrane                                                                                                                          | 2,105  | 8,52E-05 | 1,01E-03 | Up-Regulated   |
| <b>IGF2BP3</b>  | Insulin-like growth factor 2 mrna binding protein 3    | Regulation of cytokine biosynthetic process                                                                                                                    | 2,684  | 6,51E-06 | 1,31E-04 | Up-Regulated   |
| <b>IGHV3-23</b> | Immunoglobulin heavy variable 3-23                     | Fc-gamma receptor signaling pathway involved in phagocytosis                                                                                                   | 2,1    | 6,12E-06 | 1,24E-04 | Up-Regulated   |
| <b>IGHV3-23</b> | Immunoglobulin heavy variable 3-23                     | Fc-gamma receptor signaling pathway involved in phagocytosis                                                                                                   | 2,326  | 6,85E-07 | 2,18E-05 | Up-Regulated   |
| <b>IGSF6</b>    | Immunoglobulin superfamily, member 6                   | Transmembrane signaling receptor activity                                                                                                                      | 3,615  | 4,48E-14 | 2,80E-11 | Up-Regulated   |
| <b>IKZF3</b>    | IKAROS family zinc finger 3 (Aiolos)                   | RNA polymerase II transcription regulatory region sequence-specific DNA binding transcription factor activity involved in positive regulation of transcription | 2,782  | 1,22E-05 | 2,19E-04 | Up-Regulated   |
| <b>IL10</b>     | Interleukin 10                                         | Positive regulation of sequence-specific DNA binding transcription factor activity                                                                             | 2,12   | 4,41E-05 | 6,01E-04 | Up-Regulated   |
| <b>IL18BP</b>   | Interleukin 18 binding protein                         | Extracellular negative regulation of signal transduction                                                                                                       | 2,181  | 2,81E-13 | 1,28E-10 | Up-Regulated   |
| <b>IL18R1</b>   | Interleukin 18 receptor 1                              | Positive regulation of NF-kappab import into                                                                                                                   | 2,517  | 1,18E-05 | 2,13E-04 | Up-            |

|                 |                                                                      |                                                                                           |        |          |          |                |
|-----------------|----------------------------------------------------------------------|-------------------------------------------------------------------------------------------|--------|----------|----------|----------------|
|                 |                                                                      | nucleus                                                                                   |        |          |          | Regulated      |
| <b>IL18RAP</b>  | Interleukin 18 receptor accessory protein                            | Cell surface receptor signaling pathway                                                   | 2,351  | 4,44E-04 | 3,67E-03 | Up-Regulated   |
| <b>IL1B</b>     | Interleukin 1, beta                                                  | Positive regulation of vascular endothelial growth factor receptor signaling pathway      | 3,209  | 7,84E-06 | 1,53E-04 | Up-Regulated   |
| <b>IL1RAP</b>   | Interleukin 1 receptor accessory protein                             | Integral component of plasma membrane                                                     | 2,577  | 4,25E-10 | 5,66E-08 | Up-Regulated   |
| <b>IL1RN</b>    | Interleukin 1 receptor antagonist                                    | Negative regulation of interleukin-1-mediated signaling pathway                           | 3,248  | 4,45E-08 | 2,44E-06 | Up-Regulated   |
| <b>IL23A</b>    | Interleukin 23, alpha subunit p19                                    | Positive regulation of granulocyte macrophage colony-stimulating factor production        | 3,604  | 1,63E-07 | 6,82E-06 | Up-Regulated   |
| <b>IL2RG</b>    | Interleukin 2 receptor, gamma                                        | Interleukin-2-mediated signaling pathway                                                  | 2,185  | 6,27E-06 | 1,27E-04 | Up-Regulated   |
| <b>IL6</b>      | Interleukin 6                                                        | Negative regulation of cysteine-type endopeptidase activity involved in apoptotic process | 3,778  | 6,67E-09 | 5,25E-07 | Up-Regulated   |
| <b>IL7R</b>     | Interleukin 7 receptor                                               | Positive regulation of T cell differentiation in thymus                                   | 3,702  | 2,60E-16 | 6,79E-13 | Up-Regulated   |
| <b>INHBB</b>    | Inhibin, beta B                                                      | Positive regulation of pathway-restricted SMAD protein phosphorylation                    | 3,305  | 2,28E-09 | 2,21E-07 | Up-Regulated   |
| <b>IRG1</b>     | Immunoresponsive 1 homolog (mouse)                                   | Positive regulation of reactive oxygen species metabolic process                          | 4,375  | 1,11E-10 | 1,84E-08 | Up-Regulated   |
| <b>ITGA4</b>    | Integrin, alpha 4 (antigen CD49D, alpha 4 subunit of VLA-4 receptor) | Heterophilic cell-cell adhesion via plasma membrane cell adhesion molecules               | 2,695  | 2,87E-08 | 1,70E-06 | Up-Regulated   |
| <b>JCHAIN</b>   | Joining chain of multimeric iga and igm                              | Positive regulation of protein oligomerization                                            | 5,132  | 1,42E-08 | 9,55E-07 | Up-Regulated   |
| <b>KANK4</b>    | KN motif and ankyrin repeat domains 4                                | Cytoplasm                                                                                 | -2,066 | 2,45E-04 | 2,32E-03 | Down-Regulated |
| <b>KCNIP1</b>   | Kv channel interacting protein 1                                     | Extrinsic component of cytoplasmic side of plasma membrane                                | 2,307  | 1,78E-05 | 2,97E-04 | Up-Regulated   |
| <b>KIAA0101</b> | Kiaa0101                                                             | Cellular response to DNA damage stimulus                                                  | 3,592  | 1,28E-08 | 8,82E-07 | Up-Regulated   |
| <b>KIAA1598</b> | Kiaa1598                                                             | Regulation of establishment of cell polarity                                              | 2,119  | 2,43E-08 | 1,49E-06 | Up-Regulated   |
| <b>KIF11</b>    | Kinesin family member 11                                             | Antigen processing and presentation of exogenous peptide antigen via MHC class II         | 2,931  | 3,70E-06 | 8,21E-05 | Up-Regulated   |
| <b>KIF14</b>    | Kinesin family member 14                                             | SCF-dependent proteasomal ubiquitin-dependent protein catabolic process                   | 2,541  | 4,87E-08 | 2,60E-06 | Up-Regulated   |

|                       |                                                            |                                                                                                                                    |        |          |          |                |
|-----------------------|------------------------------------------------------------|------------------------------------------------------------------------------------------------------------------------------------|--------|----------|----------|----------------|
| <b>KIF18B</b>         | Kinesin family member 18B                                  | ATP-dependent microtubule motor activity, plus-end-directed                                                                        | 2,962  | 8,08E-07 | 2,44E-05 | Up-Regulated   |
| <b>KIF20A</b>         | Kinesin family member 20A                                  | Cell separation after cytokinesis                                                                                                  | 2,58   | 2,09E-07 | 8,27E-06 | Up-Regulated   |
| <b>KIF24</b>          | Kinesin family member 24                                   | Microtubule depolymerization                                                                                                       | 2,502  | 6,33E-07 | 2,03E-05 | Up-Regulated   |
| <b>KIFC1</b>          | Kinesin family member C1                                   | ATP-dependent microtubule motor activity, minus-end-directed                                                                       | 2,352  | 2,03E-07 | 8,10E-06 | Up-Regulated   |
| <b>KLC1</b>           | Kinesin light chain 1                                      | Antigen processing and presentation of exogenous peptide antigen via MHC class II                                                  | 2,125  | 1,35E-04 | 1,46E-03 | Up-Regulated   |
| <b>KLC1</b>           | Kinesin light chain 1                                      | Antigen processing and presentation of exogenous peptide antigen via MHC class II                                                  | 2,618  | 3,36E-05 | 4,90E-04 | Up-Regulated   |
| <b>KLHL6</b>          | Kelch-like family member 6                                 | Cul3-RING ubiquitin ligase complex                                                                                                 | 2,582  | 5,48E-10 | 6,59E-08 | Up-Regulated   |
| <b>KRT32</b>          | Keratin 32, type I                                         | Structural molecule activity                                                                                                       | 2,387  | 8,07E-05 | 9,72E-04 | Up-Regulated   |
| <b>KRT8</b>           | Keratin 8, type II                                         | Cell differentiation involved in embryonic placenta development                                                                    | 2,138  | 1,14E-03 | 7,92E-03 | Up-Regulated   |
| <b>LANCL3</b>         | Lanc lantibiotic synthetase component C-like 3 (bacterial) | Catalytic activity                                                                                                                 | 2,389  | 4,00E-05 | 5,63E-04 | Up-Regulated   |
| <b>LAT</b>            | Linker for activation of T cells                           | Nuclear origin of replication recognition complex                                                                                  | 2,113  | 3,19E-06 | 7,36E-05 | Up-Regulated   |
| <b>LCP1</b>           | Lymphocyte cytosolic protein 1 (L-plastin)                 | Regulation of intracellular protein transport                                                                                      | 2,276  | 6,00E-08 | 3,03E-06 | Up-Regulated   |
| <b>LECT1</b>          | Leukocyte cell derived chemotaxin 1                        | Negative regulation of vascular endothelial growth factor receptor signaling pathway                                               | -2,176 | 2,26E-04 | 2,18E-03 | Down-Regulated |
| <b>LEP</b>            | Leptin                                                     | Positive regulation of peroxisome proliferator activated receptor signaling pathway                                                | -2,371 | 1,20E-06 | 3,32E-05 | Down-Regulated |
| <b>LGALS3</b>         | Lectin, galactoside-binding, soluble, 3                    | Negative regulation of T cell activation via T cell receptor contact with antigen bound to MHC molecule on antigen presenting cell | 3,583  | 2,72E-16 | 6,79E-13 | Up-Regulated   |
| <b>LGALS7/LGALS7B</b> | Lectin, galactoside-binding, soluble, 7                    | Heterophilic cell-cell adhesion via plasma membrane cell adhesion molecules                                                        | 3,084  | 4,99E-06 | 1,05E-04 | Up-Regulated   |
| <b>LIPA</b>           | Lipase A, lysosomal acid, cholesterol esterase             | Homeostasis of number of cells within a tissue                                                                                     | 3,589  | 1,78E-07 | 7,29E-06 | Up-Regulated   |
| <b>LIPA</b>           | Lipase A, lysosomal acid, cholesterol esterase             | Homeostasis of number of cells within a tissue                                                                                     | 5,181  | 7,73E-10 | 8,98E-08 | Up-Regulated   |
| <b>LPAR3</b>          | Lysophosphatidic acid receptor 3                           | Positive regulation of cytosolic calcium ion                                                                                       | 3,454  | 1,16E-07 | 5,23E-06 | Up-            |

|                |                                                   |                                                                                             |        |          |          |                |
|----------------|---------------------------------------------------|---------------------------------------------------------------------------------------------|--------|----------|----------|----------------|
|                |                                                   | concentration involved in phospholipase C-activating G-protein coupled signaling pathway    |        |          |          | Regulated      |
| <b>LPCAT2</b>  | Lysophosphatidylcholine acyltransferase 2         | 1-alkylglycerophosphocholine O-acetyltransferase activity                                   | 2,074  | 3,12E-07 | 1,18E-05 | Up-Regulated   |
| <b>LPXN</b>    | Leupaxin                                          | Negative regulation of B cell receptor signaling pathway                                    | 2,25   | 2,29E-07 | 8,94E-06 | Up-Regulated   |
| <b>LTA</b>     | Lymphotoxin alpha                                 | Positive regulation of humoral immune response mediated by circulating immunoglobulin       | 2,109  | 9,99E-05 | 1,14E-03 | Up-Regulated   |
| <b>LY86</b>    | Lymphocyte antigen 86                             | Positive regulation of lipopolysaccharide-mediated signaling pathway                        | 2,762  | 2,16E-08 | 1,36E-06 | Up-Regulated   |
| <b>MAP3K19</b> | Mitogen-activated protein kinase kinase kinase 19 | Activation of protein kinase activity                                                       | 7,854  | 1,13E-10 | 1,85E-08 | Up-Regulated   |
| <b>MAPK13</b>  | Mitogen-activated protein kinase 13               | Vascular endothelial growth factor receptor signaling pathway                               | 2,389  | 3,92E-07 | 1,42E-05 | Up-Regulated   |
| <b>MBNL3</b>   | Muscleblind-like splicing regulator 3             | Negative regulation of myoblast differentiation                                             | 2,542  | 6,87E-07 | 2,18E-05 | Up-Regulated   |
| <b>MC5R</b>    | Melanocortin 5 receptor                           | G-protein coupled receptor signaling pathway, coupled to cyclic nucleotide second messenger | -2,426 | 1,31E-07 | 5,70E-06 | Down-Regulated |
| <b>MCM8</b>    | Minichromosome maintenance complex component 8    | Double-strand break repair via homologous recombination                                     | 2,144  | 2,69E-04 | 2,50E-03 | Up-Regulated   |
| <b>MCOLN2</b>  | Mucolipin 2                                       | Calcium ion transmembrane transport                                                         | 2,947  | 1,73E-07 | 7,15E-06 | Up-Regulated   |
| <b>MELK</b>    | Maternal embryonic leucine zipper kinase          | Intrinsic apoptotic signaling pathway in response to oxidative stress                       | 3,825  | 6,19E-07 | 2,00E-05 | Up-Regulated   |
| <b>MFSD8</b>   | Major facilitator superfamily domain containing 8 | Substrate-specific transmembrane transporter activity                                       | 3,658  | 4,01E-14 | 2,67E-11 | Up-Regulated   |
| <b>MILR1</b>   | Mast cell immunoglobulin-like receptor 1          | Negative regulation of mast cell activation                                                 | 2,481  | 8,78E-07 | 2,60E-05 | Up-Regulated   |
| <b>MLANA</b>   | Melan-A                                           | Integral component of plasma membrane                                                       | 2,085  | 5,42E-05 | 7,01E-04 | Up-Regulated   |
| <b>MMP1</b>    | Matrix metallopeptidase 1                         | Positive regulation of protein oligomerization                                              | 8,407  | 1,93E-10 | 3,06E-08 | Up-Regulated   |
| <b>MMP12</b>   | Matrix metallopeptidase 12                        | Positive regulation of epithelial cell proliferation involved in wound healing              | 6,206  | 1,97E-10 | 3,07E-08 | Up-Regulated   |
| <b>MMP13</b>   | Matrix metallopeptidase 13                        | Low-density lipoprotein particle receptor binding                                           | 7,201  | 6,86E-13 | 2,74E-10 | Up-Regulated   |
| <b>MMP3</b>    | Matrix metallopeptidase 3                         | Negative regulation of hydrogen peroxide                                                    | 4,084  | 1,22E-05 | 2,19E-04 | Up-            |

|               |                                                       |                                                                                                |        |          |          |                |
|---------------|-------------------------------------------------------|------------------------------------------------------------------------------------------------|--------|----------|----------|----------------|
|               |                                                       | metabolic process                                                                              |        |          |          | Regulated      |
| <b>MOGAT1</b> | Monoacylglycerol O-acyltransferase 1                  | 2-acylglycerol O-acyltransferase activity                                                      | 2,101  | 3,32E-04 | 2,93E-03 | Up-Regulated   |
| <b>MPEG1</b>  | Macrophage expressed 1                                | Integral component of membrane                                                                 | 2,847  | 1,03E-06 | 2,95E-05 | Up-Regulated   |
| <b>MPZ</b>    | Myelin protein zero                                   | Negative regulation of apoptotic process                                                       | -3,4   | 1,33E-09 | 1,38E-07 | Down-Regulated |
| <b>MREG</b>   | Melanoregulin                                         | Melanocyte differentiation                                                                     | 3,746  | 1,45E-15 | 2,42E-12 | Up-Regulated   |
| <b>MS4A1</b>  | Membrane-spanning 4-domains, subfamily A, member 1    | Protein kinase C-activating G-protein coupled receptor signaling pathway                       | 4,07   | 4,19E-07 | 1,48E-05 | Up-Regulated   |
| <b>MSR1</b>   | Macrophage scavenger receptor 1                       | Positive regulation of macrophage derived foam cell differentiation                            | 3,213  | 9,40E-09 | 6,86E-07 | Up-Regulated   |
| <b>MTFP1</b>  | Mitochondrial fission process 1                       | Integral component of membrane                                                                 | 3,372  | 1,06E-08 | 7,54E-07 | Up-Regulated   |
| <b>MTTP</b>   | Microsomal triglyceride transfer protein              | Small molecule metabolic process                                                               | 2,753  | 1,49E-03 | 9,73E-03 | Up-Regulated   |
| <b>MYH7</b>   | Myosin, heavy chain 7, cardiac muscle, beta           | Regulation of slow-twitch skeletal muscle fiber contraction                                    | 4,158  | 1,24E-07 | 5,44E-06 | Up-Regulated   |
| <b>MYH7B</b>  | Myosin, heavy chain 7B, cardiac muscle, beta          | Metabolic process                                                                              | -3,342 | 1,79E-07 | 7,29E-06 | Down-Regulated |
| <b>MYO1G</b>  | Myosin IG                                             | Fc-gamma receptor signaling pathway involved in phagocytosis                                   | 2,815  | 1,66E-12 | 5,72E-10 | Up-Regulated   |
| <b>MYOZ2</b>  | Myozenin 2                                            | Protein phosphatase 2B binding                                                                 | -2,448 | 1,95E-05 | 3,22E-04 | Down-Regulated |
| <b>MZB1</b>   | Marginal zone B and B1 cell-specific protein          | Negative regulation of glucose import in response to insulin stimulus                          | 4,437  | 5,72E-08 | 2,91E-06 | Up-Regulated   |
| <b>NCAPG</b>  | Non-SMC condensin I complex, subunit G                | Mitotic chromosome condensation                                                                | 2,443  | 3,72E-05 | 5,32E-04 | Up-Regulated   |
| <b>NCMAP</b>  | Noncompact myelin associated protein                  | Peripheral nervous system myelin formation                                                     | -2,569 | 3,34E-06 | 7,58E-05 | Down-Regulated |
| <b>NDUFA5</b> | NADH dehydrogenase (ubiquinone) 1 alpha subcomplex, 5 | Mitochondrial electron transport, NADH to ubiquinone                                           | 2,865  | 2,17E-11 | 4,51E-09 | Up-Regulated   |
| <b>NEIL3</b>  | Nei endonuclease VIII-like 3 (E. Coli)                | DNA-(apurinic or apyrimidinic site) lyase activity                                             | 2,628  | 1,08E-03 | 7,61E-03 | Up-Regulated   |
| <b>NEK2</b>   | NIMA-related kinase 2                                 | Anaphase-promoting complex-dependent proteasomal ubiquitin-dependent protein catabolic process | 3,178  | 1,02E-07 | 4,71E-06 | Up-Regulated   |



|                |                                                                      |                                                                                                                                                              |        |          |          |                |
|----------------|----------------------------------------------------------------------|--------------------------------------------------------------------------------------------------------------------------------------------------------------|--------|----------|----------|----------------|
| <b>NFASC</b>   | Neurofascin                                                          | Protein binding involved in heterotypic cell-cell adhesion                                                                                                   | -2,249 | 2,29E-04 | 2,21E-03 | Down-Regulated |
| <b>NIPAL4</b>  | NIPA-like domain containing 4                                        | Magnesium ion transmembrane transporter activity                                                                                                             | -2,161 | 3,23E-05 | 4,75E-04 | Down-Regulated |
| <b>NKAIN1</b>  | Na <sup>+</sup> /K <sup>+</sup> transporting atpase interacting 1    | Regulation of sodium ion transport                                                                                                                           | 3,565  | 8,48E-09 | 6,42E-07 | Up-Regulated   |
| <b>NPM1</b>    | Nucleophosmin (nucleolar phosphoprotein B23, numatrin)               | Negative regulation of protein kinase activity by regulation of protein phosphorylation                                                                      | 3,607  | 8,01E-06 | 1,55E-04 | Up-Regulated   |
| <b>NUF2</b>    | NUF2, NDC80 kinetochore complex component                            | Small gtpase mediated signal transduction                                                                                                                    | 3,212  | 7,47E-07 | 2,30E-05 | Up-Regulated   |
| <b>NYAP2</b>   | Neuronal tyrosine-phosphorylated phosphoinositide-3-kinase adaptor 2 | Phosphatidylinositol 3-kinase signaling                                                                                                                      | 2,779  | 2,43E-10 | 3,63E-08 | Up-Regulated   |
| <b>OGDHL</b>   | Oxoglutarate dehydrogenase-like                                      | Oxoglutarate dehydrogenase (succinyl-transferring) activity                                                                                                  | -2,099 | 1,15E-05 | 2,09E-04 | Down-Regulated |
| <b>OVGP1</b>   | Oviductal glycoprotein 1, 120kda                                     | Negative regulation of binding of sperm to zona pellucida                                                                                                    | 2,855  | 8,14E-08 | 3,95E-06 | Up-Regulated   |
| <b>P2RX1</b>   | Purinergic receptor P2X, ligand gated ion channel, 1                 | Activation of cysteine-type endopeptidase activity involved in apoptotic process                                                                             | -2,211 | 1,94E-06 | 4,87E-05 | Down-Regulated |
| <b>P2RY10</b>  | Purinergic receptor P2Y, G-protein coupled, 10                       | G-protein coupled purinergic nucleotide receptor signaling pathway                                                                                           | 2,564  | 4,54E-05 | 6,15E-04 | Up-Regulated   |
| <b>PARPBP</b>  | PARP1 binding protein                                                | Negative regulation of double-strand break repair via homologous recombination                                                                               | 2,383  | 2,57E-04 | 2,42E-03 | Up-Regulated   |
| <b>PAX5</b>    | Paired box 5                                                         | RNA polymerase II core promoter proximal region sequence-specific DNA binding transcription factor activity involved in positive regulation of transcription | 2,793  | 1,73E-05 | 2,91E-04 | Up-Regulated   |
| <b>PBK</b>     | PDZ binding kinase                                                   | Negative regulation of proteasomal ubiquitin-dependent protein catabolic process                                                                             | 2,934  | 3,12E-06 | 7,21E-05 | Up-Regulated   |
| <b>PCDHAC2</b> | Protocadherin alpha subfamily C, 2                                   | Homophilic cell adhesion via plasma membrane adhesion molecules                                                                                              | -3,112 | 7,76E-11 | 1,36E-08 | Down-Regulated |
| <b>PDE4B</b>   | Phosphodiesterase 4B, camp-specific                                  | Regulation of high voltage-gated calcium channel activity                                                                                                    | 2,299  | 1,45E-04 | 1,54E-03 | Up-Regulated   |
| <b>PDE6A</b>   | Phosphodiesterase 6A, cgmp-specific, rod, alpha                      | Regulation of rhodopsin mediated signaling pathway                                                                                                           | 2,271  | 8,55E-06 | 1,64E-04 | Up-Regulated   |
| <b>PFKFB1</b>  | 6-phosphofructo-2-kinase/fructose-2,6-biphosphatase 1                | 6-phosphofructo-2-kinase/fructose-2,6-biphosphatase complex                                                                                                  | -2,417 | 5,80E-07 | 1,89E-05 | Down-Regulated |
| <b>PGBD5</b>   | Piggybac transposable element derived 5                              | Integral component of membrane                                                                                                                               | 4,221  | 3,32E-11 | 6,49E-09 | Up-Regulated   |

|                |                                                                            |                                                                                                                                                              |        |          |          |                |
|----------------|----------------------------------------------------------------------------|--------------------------------------------------------------------------------------------------------------------------------------------------------------|--------|----------|----------|----------------|
| <b>PIGR</b>    | Polymeric immunoglobulin receptor                                          | Immunoglobulin transcytosis in epithelial cells mediated by polymeric immunoglobulin receptor                                                                | 3,309  | 1,73E-05 | 2,91E-04 | Up-Regulated   |
| <b>PIGR</b>    | Polymeric immunoglobulin receptor                                          | Immunoglobulin transcytosis in epithelial cells mediated by polymeric immunoglobulin receptor                                                                | 3,876  | 1,71E-06 | 4,41E-05 | Up-Regulated   |
| <b>PKIB</b>    | Protein kinase (camp-dependent, catalytic) inhibitor beta                  | Negative regulation of cyclin-dependent protein kinase activity                                                                                              | 2,442  | 4,66E-10 | 6,11E-08 | Up-Regulated   |
| <b>PLB1</b>    | Phospholipase B1                                                           | Phosphatidylcholine acyl-chain remodeling                                                                                                                    | 2,755  | 4,24E-12 | 1,21E-09 | Up-Regulated   |
| <b>PLEK</b>    | Pleckstrin                                                                 | Negative regulation of G-protein coupled receptor protein signaling pathway                                                                                  | 2,5    | 1,54E-11 | 3,40E-09 | Up-Regulated   |
| <b>PLEKHM1</b> | Pleckstrin homology domain containing, family M (with RUN domain) member 1 | Intracellular signal transduction                                                                                                                            | 2,181  | 2,35E-11 | 4,78E-09 | Up-Regulated   |
| <b>PLIN2</b>   | Perilipin 2                                                                | Response to organic cyclic compound                                                                                                                          | 3,099  | 3,90E-09 | 3,42E-07 | Up-Regulated   |
| <b>PLP1</b>    | Proteolipid protein 1                                                      | Long-chain fatty acid biosynthetic process                                                                                                                   | -2,244 | 3,60E-09 | 3,24E-07 | Down-Regulated |
| <b>PLXNC1</b>  | Plexin C1                                                                  | Semaphorin-plexin signaling pathway                                                                                                                          | 2,155  | 3,79E-08 | 2,12E-06 | Up-Regulated   |
| <b>POU2AF1</b> | POU class 2 associating factor 1                                           | Transcription from RNA polymerase II promoter                                                                                                                | 4,23   | 1,89E-08 | 1,21E-06 | Up-Regulated   |
| <b>PRDM1</b>   | PR domain containing 1, with ZNF domain                                    | RNA polymerase II core promoter proximal region sequence-specific DNA binding transcription factor activity involved in negative regulation of transcription | 2,611  | 3,39E-08 | 1,94E-06 | Up-Regulated   |
| <b>PRND</b>    | Prion protein 2 (dublet)                                                   | Anchored component of membrane                                                                                                                               | 5,761  | 1,44E-08 | 9,56E-07 | Up-Regulated   |
| <b>PRR11</b>   | Proline rich 11                                                            | Regulation of cell cycle                                                                                                                                     | 2,744  | 1,86E-05 | 3,10E-04 | Up-Regulated   |
| <b>PRTG</b>    | Protogenin                                                                 | Multicellular organismal development                                                                                                                         | 2,802  | 1,18E-07 | 5,27E-06 | Up-Regulated   |
| <b>PSG4</b>    | Pregnancy specific beta-1-glycoprotein 4                                   | Extracellular exosome                                                                                                                                        | 5,119  | 4,50E-05 | 6,11E-04 | Up-Regulated   |
| <b>PSG4</b>    | Pregnancy specific beta-1-glycoprotein 4                                   | Extracellular exosome                                                                                                                                        | 4,975  | 7,50E-08 | 3,69E-06 | Up-Regulated   |
| <b>PSG4</b>    | Pregnancy specific beta-1-glycoprotein 4                                   | Extracellular exosome                                                                                                                                        | 4,979  | 2,73E-08 | 1,62E-06 | Up-Regulated   |

|                 |                                                                                       |                                                                                                                                                              |        |          |          |                |
|-----------------|---------------------------------------------------------------------------------------|--------------------------------------------------------------------------------------------------------------------------------------------------------------|--------|----------|----------|----------------|
| <b>PTGER3</b>   | Prostaglandin E receptor 3 (subtype EP3)                                              | Ligand-activated sequence-specific DNA binding RNA polymerase II transcription factor activity                                                               | -2,149 | 1,66E-07 | 6,90E-06 | Down-Regulated |
| <b>PTGS2</b>    | Prostaglandin-endoperoxide synthase 2 (prostaglandin G/H synthase and cyclooxygenase) | Positive regulation of cell migration involved in sprouting angiogenesis                                                                                     | 2,685  | 1,78E-12 | 5,72E-10 | Up-Regulated   |
| <b>PTPN22</b>   | Protein tyrosine phosphatase, non-receptor type 22 (lymphoid)                         | Negative regulation of nucleotide-binding oligomerization domain containing 2 signaling pathway                                                              | 2,464  | 4,14E-07 | 1,47E-05 | Up-Regulated   |
| <b>PTPRC</b>    | Protein tyrosine phosphatase, receptor type, C                                        | Negative regulation of cell adhesion involved in substrate-bound cell migration                                                                              | 2,396  | 4,32E-09 | 3,69E-07 | Up-Regulated   |
| <b>PTPRO</b>    | Protein tyrosine phosphatase, receptor type, O                                        | Transmembrane receptor protein tyrosine phosphatase signaling pathway                                                                                        | 2,288  | 9,59E-09 | 6,94E-07 | Up-Regulated   |
| <b>PTX3</b>     | Pentraxin 3, long                                                                     | RNA polymerase II core promoter proximal region sequence-specific DNA binding transcription factor activity involved in positive regulation of transcription | 2,131  | 3,07E-06 | 7,16E-05 | Up-Regulated   |
| <b>PVR</b>      | Poliovirus receptor                                                                   | Positive regulation of natural killer cell mediated cytotoxicity directed against tumor cell target                                                          | 4,28   | 1,31E-07 | 5,70E-06 | Up-Regulated   |
| <b>PVR</b>      | Poliovirus receptor                                                                   | Positive regulation of natural killer cell mediated cytotoxicity directed against tumor cell target                                                          | 3,815  | 1,41E-12 | 5,21E-10 | Up-Regulated   |
| <b>RAB27B</b>   | RAB27B, member RAS oncogene family                                                    | Vesicle docking involved in exocytosis                                                                                                                       | -2,289 | 6,02E-05 | 7,63E-04 | Down-Regulated |
| <b>RACGAP1</b>  | Rac gtpase activating protein 1                                                       | Antigen processing and presentation of exogenous peptide antigen via MHC class II                                                                            | 2,232  | 5,39E-06 | 1,12E-04 | Up-Regulated   |
| <b>RAD23A</b>   | RAD23 homolog A (S. Cerevisiae)                                                       | Regulation of proteasomal ubiquitin-dependent protein catabolic process                                                                                      | 4,195  | 8,31E-07 | 2,48E-05 | Up-Regulated   |
| <b>RAD51</b>    | RAD51 recombinase                                                                     | Replication-born double-strand break repair via sister chromatid exchange                                                                                    | 2,416  | 2,93E-05 | 4,40E-04 | Up-Regulated   |
| <b>RAD51AP1</b> | RAD51 associated protein 1                                                            | Regulation of double-strand break repair via homologous recombination                                                                                        | 2,404  | 1,01E-05 | 1,88E-04 | Up-Regulated   |
| <b>RAD9A</b>    | RAD9 homolog A (S. Pombe)                                                             | Positive regulation of intrinsic apoptotic signaling pathway in response to DNA damage                                                                       | 2,398  | 5,81E-04 | 4,60E-03 | Up-Regulated   |
| <b>RASSF6</b>   | Ras association (ralgds/AF-6) domain family member 6                                  | Positive regulation of apoptotic process                                                                                                                     | 3,185  | 4,90E-07 | 1,67E-05 | Up-Regulated   |
| <b>RBM47</b>    | RNA binding motif protein 47                                                          | Poly(A) RNA binding                                                                                                                                          | 2,039  | 7,37E-08 | 3,64E-06 | Up-            |

|                |                                                           |                                                                                     |        |          |          |                |
|----------------|-----------------------------------------------------------|-------------------------------------------------------------------------------------|--------|----------|----------|----------------|
|                |                                                           |                                                                                     |        |          |          | Regulated      |
| <b>RGR</b>     | Retinal G protein coupled receptor                        | G-protein coupled receptor signaling pathway                                        | 2,506  | 5,54E-07 | 1,82E-05 | Up-Regulated   |
| <b>RGS1</b>    | Regulator of G-protein signaling 1                        | Adenylate cyclase-inhibiting G-protein coupled receptor signaling pathway           | 3,944  | 1,77E-12 | 5,72E-10 | Up-Regulated   |
| <b>RGS18</b>   | Regulator of G-protein signaling 18                       | Termination of G-protein coupled receptor signaling pathway                         | 2,003  | 3,13E-05 | 4,62E-04 | Up-Regulated   |
| <b>RHOH</b>    | Ras homolog family member H                               | Negative regulation of I-kappab kinase/NF-kappab signaling                          | 2,159  | 6,89E-04 | 5,27E-03 | Up-Regulated   |
| <b>RMI2</b>    | Recq mediated genome instability 2                        | DNA replication                                                                     | 2,708  | 6,58E-06 | 1,32E-04 | Up-Regulated   |
| <b>RNF128</b>  | Ring finger protein 128, E3 ubiquitin protein ligase      | Protein ubiquitination involved in ubiquitin-dependent protein catabolic process    | 3,244  | 1,03E-11 | 2,45E-09 | Up-Regulated   |
| <b>RPS24</b>   | Ribosomal protein S24                                     | Maturation of SSU-rna from tricistronic rna transcript (SSU-rna, 5.8S rna, LSU-rna) | 2,617  | 1,10E-03 | 7,69E-03 | Up-Regulated   |
| <b>RS1</b>     | Retinoschisin 1                                           | Phosphatidylinositol-3,4,5-trisphosphate binding                                    | 2,487  | 1,52E-04 | 1,61E-03 | Up-Regulated   |
| <b>RTN4RL2</b> | Reticulon 4 receptor-like 2                               | Anchored component of plasma membrane                                               | 4,082  | 3,00E-14 | 2,14E-11 | Up-Regulated   |
| <b>S100A12</b> | S100 calcium binding protein A12                          | Positive regulation of NF-kappab transcription factor activity                      | 3,974  | 1,55E-05 | 2,68E-04 | Up-Regulated   |
| <b>S100A8</b>  | S100 calcium binding protein A8                           | Activation of cysteine-type endopeptidase activity involved in apoptotic process    | 4,471  | 8,81E-10 | 1,00E-07 | Up-Regulated   |
| <b>S100A9</b>  | S100 calcium binding protein A9                           | Activation of cysteine-type endopeptidase activity involved in apoptotic process    | 3,88   | 4,40E-07 | 1,55E-05 | Up-Regulated   |
| <b>S100B</b>   | S100 calcium binding protein B                            | Negative regulation of skeletal muscle cell differentiation                         | -2,304 | 1,68E-12 | 5,72E-10 | Down-Regulated |
| <b>S1PR3</b>   | Sphingosine-1-phosphate receptor 3                        | Adenylate cyclase-inhibiting G-protein coupled receptor signaling pathway           | 3,312  | 4,08E-07 | 1,45E-05 | Up-Regulated   |
| <b>SAMSN1</b>  | SAM domain, SH3 domain and nuclear localization signals 1 | Negative regulation of peptidyl-tyrosine phosphorylation                            | 2,718  | 6,50E-10 | 7,64E-08 | Up-Regulated   |
| <b>SAPCD1</b>  | Suppressor APC domain containing 1                        | Unknown                                                                             | -2,205 | 1,57E-10 | 2,53E-08 | Down-Regulated |
| <b>SCG2</b>    | Secretogranin II                                          | Negative regulation of sequence-specific DNA binding transcription factor activity  | 3,773  | 3,93E-04 | 3,34E-03 | Up-Regulated   |
| <b>SCIMP</b>   | SLP adaptor and CSK interacting membrane protein          | Positive regulation of ERK1 and ERK2 cascade                                        | 5,091  | 5,28E-09 | 4,40E-07 | Up-Regulated   |
| <b>SCN4A</b>   | Sodium channel, voltage gated, type IV                    | Membrane depolarization during action                                               | 2,368  | 3,47E-05 | 5,02E-04 | Up-            |

|                 |                                                                                    |                                                                                        |        |          |          |                |
|-----------------|------------------------------------------------------------------------------------|----------------------------------------------------------------------------------------|--------|----------|----------|----------------|
|                 | alpha subunit                                                                      | potential                                                                              |        |          |          | Regulated      |
| <b>SCN7A</b>    | Sodium channel, voltage gated, type VII alpha subunit                              | Membrane depolarization during action potential                                        | -2,228 | 4,81E-06 | 1,02E-04 | Down-Regulated |
| <b>SERPINB2</b> | Serpin peptidase inhibitor, clade B (ovalbumin), member 2                          | Negative regulation of endopeptidase activity                                          | 3,195  | 6,47E-05 | 8,09E-04 | Up-Regulated   |
| <b>SFRP5</b>    | Secreted frizzled-related protein 5                                                | Negative regulation of Wnt signaling pathway involved in digestive tract morphogenesis | -2,394 | 4,40E-08 | 2,44E-06 | Down-Regulated |
| <b>SGOL1</b>    | Shugoshin-like 1 (S. Pombe)                                                        | Attachment of spindle microtubules to kinetochore                                      | 2,318  | 3,17E-04 | 2,82E-03 | Up-Regulated   |
| <b>SGPL1</b>    | Sphingosine-1-phosphate lyase 1                                                    | Platelet-derived growth factor receptor signaling pathway                              | 2,051  | 1,78E-07 | 7,29E-06 | Up-Regulated   |
| <b>SH2D1B</b>   | SH2 domain containing 1B                                                           | Positive regulation of natural killer cell mediated immunity                           | 2,482  | 9,19E-07 | 2,68E-05 | Up-Regulated   |
| <b>SIGLEC15</b> | Sialic acid binding Ig-like lectin 15                                              | Cellular response to lipoprotein particle stimulus                                     | 3,027  | 2,86E-07 | 1,10E-05 | Up-Regulated   |
| <b>SIRPB1</b>   | Signal-regulatory protein beta 1                                                   | Cell surface receptor signaling pathway                                                | 3,985  | 1,78E-04 | 1,82E-03 | Up-Regulated   |
| <b>SIRPB1</b>   | Signal-regulatory protein beta 1                                                   | Cell surface receptor signaling pathway                                                | 5,665  | 5,54E-09 | 4,53E-07 | Up-Regulated   |
| <b>SIRPB2</b>   | Signal-regulatory protein beta 2                                                   | Positive regulation of cell-cell adhesion                                              | 2,091  | 5,04E-08 | 2,68E-06 | Up-Regulated   |
| <b>SLAMF1</b>   | Signaling lymphocytic activation molecule family member 1                          | Positive regulation of cell proliferation                                              | 2,893  | 7,33E-07 | 2,27E-05 | Up-Regulated   |
| <b>SLAMF6</b>   | SLAM family member 6                                                               | Integral component of membrane                                                         | 3,339  | 3,93E-09 | 3,42E-07 | Up-Regulated   |
| <b>SLAMF7</b>   | SLAM family member 7                                                               | Natural killer cell mediated cytotoxicity                                              | 6,67   | 2,89E-14 | 2,14E-11 | Up-Regulated   |
| <b>SLAMF8</b>   | SLAM family member 8                                                               | Regulation of NAD(P)H oxidase activity                                                 | 2,166  | 1,01E-05 | 1,88E-04 | Up-Regulated   |
| <b>SLC11A1</b>  | Solute carrier family 11 (proton-coupled divalent metal ion transporter), member 1 | Positive regulation of dendritic cell antigen processing and presentation              | 4,39   | 1,37E-08 | 9,22E-07 | Up-Regulated   |
| <b>SLC16A6</b>  | Solute carrier family 16, member 6                                                 | Monocarboxylic acid transmembrane transporter activity                                 | 3,28   | 1,01E-09 | 1,13E-07 | Up-Regulated   |
| <b>SLC35D2</b>  | Solute carrier family 35 (UDP-glcnac/UDP-glucose transporter), member D2           | Pyrimidine nucleotide-sugar transmembrane transporter activity                         | 2,056  | 1,37E-07 | 5,90E-06 | Up-Regulated   |
| <b>SLC35D3</b>  | Solute carrier family 35, member D3                                                | Pyrimidine nucleotide-sugar transmembrane                                              | 2,987  | 1,17E-05 | 2,11E-04 | Up-            |

|                |                                                                                             |                                                                                                                                                              |        |          |          |                |
|----------------|---------------------------------------------------------------------------------------------|--------------------------------------------------------------------------------------------------------------------------------------------------------------|--------|----------|----------|----------------|
|                |                                                                                             | transporter activity                                                                                                                                         |        |          |          | Regulated      |
| <b>SLC35F1</b> | Solute carrier family 35, member F1                                                         | Integral component of membrane                                                                                                                               | -2,288 | 3,95E-07 | 1,43E-05 | Down-Regulated |
| <b>SLC36A2</b> | Solute carrier family 36 (proton/amino acid symporter), member 2                            | Hydrogen ion transmembrane transporter activity                                                                                                              | -2,072 | 4,47E-05 | 6,08E-04 | Down-Regulated |
| <b>SLC44A4</b> | Solute carrier family 44, member 4                                                          | Glycerophospholipid biosynthetic process                                                                                                                     | 2,198  | 4,23E-05 | 5,84E-04 | Up-Regulated   |
| <b>SLC6A15</b> | Solute carrier family 6 (neutral amino acid transporter), member 15                         | Neurotransmitter:sodium symporter activity                                                                                                                   | 3,409  | 4,83E-08 | 2,60E-06 | Up-Regulated   |
| <b>SLC6A7</b>  | Solute carrier family 6 (neurotransmitter transporter), member 7                            | L-proline transmembrane transporter activity                                                                                                                 | 2,689  | 1,62E-06 | 4,28E-05 | Up-Regulated   |
| <b>SLC7A10</b> | Solute carrier family 7 (neutral amino acid transporter light chain, asc system), member 10 | Neutral amino acid transmembrane transporter activity                                                                                                        | -2,088 | 4,76E-04 | 3,89E-03 | Down-Regulated |
| <b>SLC7A11</b> | Solute carrier family 7 (anionic amino acid transporter light chain, xc- system), member 11 | Integral component of plasma membrane                                                                                                                        | 3,344  | 3,59E-06 | 8,02E-05 | Up-Regulated   |
| <b>SLC7A7</b>  | Solute carrier family 7 (amino acid transporter light chain, y+L system), member 7          | Basic amino acid transmembrane transporter activity                                                                                                          | 2,097  | 4,66E-07 | 1,62E-05 | Up-Regulated   |
| <b>SLCO4C1</b> | Solute carrier organic anion transporter family, member 4C1                                 | Sodium-independent organic anion transport                                                                                                                   | 4,099  | 1,31E-08 | 8,96E-07 | Up-Regulated   |
| <b>SMPDL3B</b> | Sphingomyelin phosphodiesterase, acid-like 3B                                               | Hydrolase activity, acting on glycosyl bonds                                                                                                                 | 2,57   | 5,66E-05 | 7,28E-04 | Up-Regulated   |
| <b>SNX10</b>   | Sorting nexin 10                                                                            | Extrinsic component of endosome membrane                                                                                                                     | 2,372  | 2,34E-09 | 2,25E-07 | Up-Regulated   |
| <b>SORCS1</b>  | Sortilin-related VPS10 domain containing receptor 1                                         | Integral component of membrane                                                                                                                               | -2,703 | 3,77E-07 | 1,38E-05 | Down-Regulated |
| <b>SOST</b>    | Sclerostin                                                                                  | Negative regulation of Wnt signaling pathway involved in dorsal/ventral axis specification                                                                   | -2,05  | 9,65E-04 | 6,95E-03 | Down-Regulated |
| <b>SPAG5</b>   | Sperm associated antigen 5                                                                  | Regulation of attachment of spindle microtubules to kinetochore                                                                                              | 3,271  | 1,92E-06 | 4,87E-05 | Up-Regulated   |
| <b>SPI1</b>    | Spi-1 proto-oncogene                                                                        | RNA polymerase II core promoter proximal region sequence-specific DNA binding transcription factor activity involved in negative regulation of transcription | 2,178  | 1,22E-08 | 8,47E-07 | Up-Regulated   |
| <b>SPOCK1</b>  | Sparc/osteonectin, cwcv and kazal-like domains proteoglycan (testican) 1                    | Negative regulation of neuron projection development                                                                                                         | 2,393  | 1,29E-04 | 1,41E-03 | Up-Regulated   |

|                |                                                                 |                                                                                                                                                              |        |          |          |                |
|----------------|-----------------------------------------------------------------|--------------------------------------------------------------------------------------------------------------------------------------------------------------|--------|----------|----------|----------------|
| <b>SRCIN1</b>  | SRC kinase signaling inhibitor 1                                | Negative regulation of protein tyrosine kinase activity                                                                                                      | -4,21  | 7,90E-08 | 3,85E-06 | Down-Regulated |
| <b>SRGN</b>    | Serglycin                                                       | Maintenance of protease location in mast cell secretory granule                                                                                              | 3,309  | 3,29E-10 | 4,63E-08 | Up-Regulated   |
| <b>SSTR1</b>   | Somatostatin receptor 1                                         | G-protein coupled receptor signaling pathway, coupled to cyclic nucleotide second messenger                                                                  | -2,067 | 3,72E-04 | 3,18E-03 | Down-Regulated |
| <b>ST3GAL5</b> | ST3 beta-galactoside alpha-2,3-sialyltransferase 5              | Neolactotetraosylceramide alpha-2,3-sialyltransferase activity                                                                                               | 2,093  | 2,02E-07 | 8,09E-06 | Up-Regulated   |
| <b>STAP1</b>   | Signal transducing adaptor family member 1                      | Positive regulation of non-membrane spanning protein tyrosine kinase activity                                                                                | 2,109  | 1,19E-04 | 1,32E-03 | Up-Regulated   |
| <b>STIL</b>    | SCL/TAL1 interrupting locus                                     | Positive regulation of cyclin-dependent protein serine/threonine kinase activity                                                                             | 3,181  | 6,65E-06 | 1,33E-04 | Up-Regulated   |
| <b>STX11</b>   | Syntaxin 11                                                     | Synaptic vesicle fusion to presynaptic membrane                                                                                                              | 3,049  | 2,42E-08 | 1,49E-06 | Up-Regulated   |
| <b>SUCNR1</b>  | Succinate receptor 1                                            | G-protein coupled receptor signaling pathway                                                                                                                 | 3,843  | 1,59E-07 | 6,76E-06 | Up-Regulated   |
| <b>SUSD3</b>   | Sushi domain containing 3                                       | Integral component of membrane                                                                                                                               | 2,1    | 9,75E-08 | 4,55E-06 | Up-Regulated   |
| <b>TCF19</b>   | Transcription factor 19                                         | Regulation of transcription from RNA polymerase II promoter                                                                                                  | 2,048  | 9,95E-05 | 1,14E-03 | Up-Regulated   |
| <b>TCN1</b>    | Transcobalamin I (vitamin B12 binding protein, R binder family) | Water-soluble vitamin metabolic process                                                                                                                      | 3,345  | 1,77E-05 | 2,96E-04 | Up-Regulated   |
| <b>TESPA1</b>  | Thymocyte expressed, positive selection associated 1            | Positive regulation of T cell receptor signaling pathway                                                                                                     | 2,938  | 8,77E-09 | 6,59E-07 | Up-Regulated   |
| <b>TFEC</b>    | Transcription factor EC                                         | RNA polymerase II core promoter proximal region sequence-specific DNA binding transcription factor activity involved in positive regulation of transcription | 2,519  | 2,49E-07 | 9,66E-06 | Up-Regulated   |
| <b>TGFA</b>    | Transforming growth factor, alpha                               | Positive regulation of epidermal growth factor-activated receptor activity                                                                                   | 4,673  | 1,17E-11 | 2,65E-09 | Up-Regulated   |
| <b>THRSP</b>   | Thyroid hormone responsive                                      | Regulation of triglyceride biosynthetic process                                                                                                              | -3,089 | 1,78E-06 | 4,55E-05 | Down-Regulated |
| <b>TIAM1</b>   | T-cell lymphoma invasion and metastasis 1                       | Extrinsic component of cytoplasmic side of plasma membrane                                                                                                   | 2,143  | 5,87E-08 | 2,98E-06 | Up-Regulated   |
| <b>TLR10</b>   | Toll-like receptor 10                                           | Myd88-dependent toll-like receptor signaling pathway                                                                                                         | 2,209  | 1,58E-05 | 2,72E-04 | Up-Regulated   |
| <b>TLR2</b>    | Toll-like receptor 2                                            | Induction by symbiont of defense-related host nitric oxide production                                                                                        | 2,165  | 1,22E-07 | 5,38E-06 | Up-Regulated   |

|                  |                                                        |                                                                                                   |        |          |          |                |
|------------------|--------------------------------------------------------|---------------------------------------------------------------------------------------------------|--------|----------|----------|----------------|
| <b>TMEM156</b>   | Transmembrane protein 156                              | Integral component of membrane                                                                    | 2,456  | 4,77E-06 | 1,02E-04 | Up-Regulated   |
| <b>TMEM233</b>   | Transmembrane protein 233                              | Integral component of membrane                                                                    | -2,646 | 2,31E-05 | 3,68E-04 | Down-Regulated |
| <b>TMEM26</b>    | Transmembrane protein 26                               | Integral component of membrane                                                                    | 2,509  | 1,56E-06 | 4,13E-05 | Up-Regulated   |
| <b>TMEM37</b>    | Transmembrane protein 37                               | Regulation of ion transmembrane transport                                                         | 2,096  | 1,52E-06 | 4,06E-05 | Up-Regulated   |
| <b>TMPRSS11D</b> | Transmembrane protease, serine 11D                     | Integral component of plasma membrane                                                             | 2,239  | 9,63E-04 | 6,94E-03 | Up-Regulated   |
| <b>TNFRSF17</b>  | Tumor necrosis factor receptor superfamily, member 17  | Multicellular organismal development                                                              | 3,411  | 5,91E-06 | 1,21E-04 | Up-Regulated   |
| <b>TNFSF11</b>   | Tumor necrosis factor (ligand) superfamily, member 11  | Positive regulation of fever generation by positive regulation of prostaglandin secretion         | 2,237  | 2,91E-04 | 2,63E-03 | Up-Regulated   |
| <b>TNFSF13B</b>  | Tumor necrosis factor (ligand) superfamily, member 13b | Positive regulation of germinal center formation                                                  | 2,231  | 2,23E-08 | 1,39E-06 | Up-Regulated   |
| <b>TNIP3</b>     | TNFAIP3 interacting protein 3                          | Negative regulation of I-kappab kinase/NF-kappab signaling                                        | 3,007  | 2,67E-08 | 1,60E-06 | Up-Regulated   |
| <b>TOP2A</b>     | Topoisomerase (DNA) II alpha 170kda                    | Positive regulation of single stranded viral RNA replication via double stranded DNA intermediate | 2,336  | 1,03E-05 | 1,91E-04 | Up-Regulated   |
| <b>TREM1</b>     | Triggering receptor expressed on myeloid cells 1       | Activation of mitophagy in response to mitochondrial depolarization                               | 4,346  | 4,86E-10 | 6,14E-08 | Up-Regulated   |
| <b>TREML2</b>    | Triggering receptor expressed on myeloid cells-like 2  | Integral component of membrane                                                                    | 4,572  | 2,79E-06 | 6,59E-05 | Up-Regulated   |
| <b>TREML2</b>    | Triggering receptor expressed on myeloid cells-like 2  | Integral component of membrane                                                                    | 4,098  | 1,28E-04 | 1,39E-03 | Up-Regulated   |
| <b>TREML2</b>    | Triggering receptor expressed on myeloid cells-like 2  | Integral component of membrane                                                                    | 4,275  | 1,97E-06 | 4,95E-05 | Up-Regulated   |
| <b>TREML2</b>    | Triggering receptor expressed on myeloid cells-like 2  | Integral component of membrane                                                                    | 5,991  | 5,24E-10 | 6,39E-08 | Up-Regulated   |
| <b>TREML2</b>    | Triggering receptor expressed on myeloid cells-like 2  | Integral component of membrane                                                                    | 3,421  | 2,42E-04 | 2,31E-03 | Up-Regulated   |
| <b>TREML2</b>    | Triggering receptor expressed on myeloid cells-like 2  | Integral component of membrane                                                                    | 5,149  | 9,33E-07 | 2,70E-05 | Up-Regulated   |
| <b>TREML2</b>    | Triggering receptor expressed on myeloid cells-like 2  | Integral component of membrane                                                                    | 5,487  | 1,12E-06 | 3,13E-05 | Up-Regulated   |
| <b>TREML2</b>    | Triggering receptor expressed on                       | Integral component of membrane                                                                    | 4      | 5,31E-08 | 2,75E-06 | Up-            |



|               |                                                       |                                |       |          |          |              |
|---------------|-------------------------------------------------------|--------------------------------|-------|----------|----------|--------------|
|               | myeloid cells-like 2                                  |                                |       |          |          | Regulated    |
| <b>TREML2</b> | Triggering receptor expressed on myeloid cells-like 2 | Integral component of membrane | 5,191 | 3,80E-09 | 3,36E-07 | Up-Regulated |
| <b>TREML2</b> | Triggering receptor expressed on myeloid cells-like 2 | Integral component of membrane | 5,02  | 3,35E-06 | 7,60E-05 | Up-Regulated |
| <b>TREML2</b> | Triggering receptor expressed on myeloid cells-like 2 | Integral component of membrane | 3,547 | 1,67E-04 | 1,73E-03 | Up-Regulated |
| <b>TREML2</b> | Triggering receptor expressed on myeloid cells-like 2 | Integral component of membrane | 3,839 | 1,01E-05 | 1,88E-04 | Up-Regulated |
| <b>TREML2</b> | Triggering receptor expressed on myeloid cells-like 2 | Integral component of membrane | 5,332 | 9,17E-09 | 6,79E-07 | Up-Regulated |
| <b>TREML2</b> | Triggering receptor expressed on myeloid cells-like 2 | Integral component of membrane | 5,417 | 9,11E-09 | 6,79E-07 | Up-Regulated |
| <b>TREML2</b> | Triggering receptor expressed on myeloid cells-like 2 | Integral component of membrane | 5,139 | 8,77E-07 | 2,60E-05 | Up-Regulated |
| <b>TREML2</b> | Triggering receptor expressed on myeloid cells-like 2 | Integral component of membrane | 3,754 | 1,27E-05 | 2,26E-04 | Up-Regulated |
| <b>TREML2</b> | Triggering receptor expressed on myeloid cells-like 2 | Integral component of membrane | 5,665 | 5,03E-07 | 1,70E-05 | Up-Regulated |
| <b>TREML2</b> | Triggering receptor expressed on myeloid cells-like 2 | Integral component of membrane | 4,579 | 1,50E-05 | 2,61E-04 | Up-Regulated |
| <b>TREML2</b> | Triggering receptor expressed on myeloid cells-like 2 | Integral component of membrane | 4,251 | 2,09E-06 | 5,16E-05 | Up-Regulated |
| <b>TREML2</b> | Triggering receptor expressed on myeloid cells-like 2 | Integral component of membrane | 6,037 | 6,86E-09 | 5,35E-07 | Up-Regulated |
| <b>TREML2</b> | Triggering receptor expressed on myeloid cells-like 2 | Integral component of membrane | 5,1   | 5,23E-08 | 2,72E-06 | Up-Regulated |
| <b>TREML2</b> | Triggering receptor expressed on myeloid cells-like 2 | Integral component of membrane | 3,996 | 2,68E-05 | 4,14E-04 | Up-Regulated |
| <b>TREML2</b> | Triggering receptor expressed on myeloid cells-like 2 | Integral component of membrane | 7,583 | 1,06E-06 | 3,01E-05 | Up-Regulated |
| <b>TREML2</b> | Triggering receptor expressed on myeloid cells-like 2 | Integral component of membrane | 6,054 | 2,37E-08 | 1,47E-06 | Up-Regulated |
| <b>TREML2</b> | Triggering receptor expressed on myeloid cells-like 2 | Integral component of membrane | 3,771 | 2,79E-04 | 2,57E-03 | Up-Regulated |
| <b>TREML2</b> | Triggering receptor expressed on myeloid cells-like 2 | Integral component of membrane | 4,355 | 2,88E-05 | 4,34E-04 | Up-Regulated |
| <b>TREML2</b> | Triggering receptor expressed on                      | Integral component of membrane | 5,873 | 3,82E-11 | 7,20E-09 | Up-          |

|                |                                                                   |                                                                        |        |          |          |                |
|----------------|-------------------------------------------------------------------|------------------------------------------------------------------------|--------|----------|----------|----------------|
|                | myeloid cells-like 2                                              |                                                                        |        |          |          | Regulated      |
| <b>TREML2</b>  | Triggering receptor expressed on myeloid cells-like 2             | Integral component of membrane                                         | 4,231  | 8,54E-06 | 1,64E-04 | Up-Regulated   |
| <b>TREML2</b>  | Triggering receptor expressed on myeloid cells-like 2             | Integral component of membrane                                         | 4,745  | 1,62E-07 | 6,82E-06 | Up-Regulated   |
| <b>TREML2</b>  | Triggering receptor expressed on myeloid cells-like 2             | Integral component of membrane                                         | 3,894  | 1,76E-05 | 2,95E-04 | Up-Regulated   |
| <b>TREML2</b>  | Triggering receptor expressed on myeloid cells-like 2             | Integral component of membrane                                         | 4,291  | 3,87E-05 | 5,47E-04 | Up-Regulated   |
| <b>TREML2</b>  | Triggering receptor expressed on myeloid cells-like 2             | Integral component of membrane                                         | 7,083  | 1,36E-07 | 5,87E-06 | Up-Regulated   |
| <b>TREML2</b>  | Triggering receptor expressed on myeloid cells-like 2             | Integral component of membrane                                         | 6,245  | 1,16E-06 | 3,22E-05 | Up-Regulated   |
| <b>TREML2</b>  | Triggering receptor expressed on myeloid cells-like 2             | Integral component of membrane                                         | 4,9    | 1,73E-06 | 4,47E-05 | Up-Regulated   |
| <b>TREML2</b>  | Triggering receptor expressed on myeloid cells-like 2             | Integral component of membrane                                         | 4,671  | 1,08E-06 | 3,07E-05 | Up-Regulated   |
| <b>TREML2</b>  | Triggering receptor expressed on myeloid cells-like 2             | Integral component of membrane                                         | 4,948  | 7,10E-07 | 2,23E-05 | Up-Regulated   |
| <b>TREML2</b>  | Triggering receptor expressed on myeloid cells-like 2             | Integral component of membrane                                         | 3,039  | 3,98E-04 | 3,36E-03 | Up-Regulated   |
| <b>TREML3P</b> | Triggering receptor expressed on myeloid cells-like 3, pseudogene | Unknown                                                                | 4,932  | 4,66E-08 | 2,53E-06 | Up-Regulated   |
| <b>TROAP</b>   | Trophinin associated protein                                      | Protein binding                                                        | 2,021  | 4,90E-04 | 3,97E-03 | Up-Regulated   |
| <b>TTK</b>     | TTK protein kinase                                                | Positive regulation of pathway-restricted SMAD protein phosphorylation | 2,88   | 2,66E-04 | 2,48E-03 | Up-Regulated   |
| <b>TUBA4A</b>  | Tubulin, alpha 4a                                                 | 'De novo' posttranslational protein folding                            | 3,153  | 4,56E-08 | 2,49E-06 | Up-Regulated   |
| <b>TXLNB</b>   | Taxilin beta                                                      | Syntaxin binding                                                       | 2,408  | 4,68E-06 | 1,00E-04 | Up-Regulated   |
| <b>UBASH3B</b> | Ubiquitin associated and SH3 domain containing B                  | Regulation of release of sequestered calcium ion into cytosol          | 2,427  | 6,47E-09 | 5,13E-07 | Up-Regulated   |
| <b>UBE2T</b>   | Ubiquitin-conjugating enzyme E2T                                  | Cellular response to DNA damage stimulus                               | 2,217  | 2,81E-05 | 4,27E-04 | Up-Regulated   |
| <b>USH2A</b>   | Usher syndrome 2A (autosomal recessive, mild)                     | Inner ear receptor cell differentiation                                | -2,932 | 9,33E-08 | 4,39E-06 | Down-Regulated |
| <b>VSIG4</b>   | V-set and immunoglobulin domain                                   | Negative regulation of interleukin-2 production                        | 2,174  | 3,88E-05 | 5,49E-04 | Up-            |

|               |                                                 |                                                                                             |        |          |          |                |
|---------------|-------------------------------------------------|---------------------------------------------------------------------------------------------|--------|----------|----------|----------------|
|               | containing 4                                    |                                                                                             |        |          |          | Regulated      |
| <b>VSTM2A</b> | V-set and transmembrane domain containing 2A    | Extracellular region                                                                        | -2,366 | 2,43E-06 | 5,89E-05 | Down-Regulated |
| <b>VTN</b>    | Vitronectin                                     | Positive regulation of vascular endothelial growth factor receptor signaling pathway        | 2,774  | 9,01E-04 | 6,56E-03 | Up-Regulated   |
| <b>XCR1</b>   | Chemokine (C motif) receptor 1                  | G-protein coupled receptor signaling pathway, coupled to cyclic nucleotide second messenger | 2,505  | 8,06E-05 | 9,71E-04 | Up-Regulated   |
| <b>XDH</b>    | Xanthine dehydrogenase                          | Activation of cysteine-type endopeptidase activity involved in apoptotic process            | 6,298  | 2,62E-10 | 3,85E-08 | Up-Regulated   |
| <b>XIRP1</b>  | Xin actin-binding repeat containing 1           | Actin cytoskeleton organization                                                             | -2,233 | 4,43E-04 | 3,67E-03 | Down-Regulated |
| <b>XPR1</b>   | Xenotropic and polytropic retrovirus receptor 1 | G-protein coupled receptor signaling pathway                                                | 2,217  | 1,80E-11 | 3,82E-09 | Up-Regulated   |
| <b>ZWILCH</b> | Zwilch kinetochore protein                      | Small gtpase mediated signal transduction                                                   | 2,427  | 2,05E-06 | 5,08E-05 | Up-Regulated   |

Note: Genes were determined to be differentially expressed if the P value was <0.05, the false discovery rate was <0.01, and the fold change was > 2 (up-regulated) or < - 2 (down-regulated). Genes variation were determined by IPA software. Genes main functions were determined using gene ontology (<http://geneontology.org/>).

Online table 2: Most involved canonical pathways, coil versus control, determined by IPA

| Canonical Biological Pathway                                | No. of Genes Up-Regulated | Genes                                                                                                               | No. of Genes Down-Regulated | Gene(s)                   |
|-------------------------------------------------------------|---------------------------|---------------------------------------------------------------------------------------------------------------------|-----------------------------|---------------------------|
| Altered T Cell and B Cell Signaling in Rheumatoid Arthritis | 15                        | <i>CD79B, CXCL13, HLA-DRA, IL6, IL10, IL1B, IL1RN, IL23A, LTA, SLAMF1, TLR2, TLR10, TNFRSF17, TNFSF11, TNFSF13B</i> | 0                           | NA                        |
| Granulocyte Adhesion and Diapedesis                         | 16                        | <i>CCL4, CCL5, CCL20, CXCL8, CXCL13, CXCR4, IL18RAP, IL1B, IL1RAP, IL1RN, ITGA4, MMP1, MMP3, MMP12, MMP13</i>       | 2                           | <i>CLDN19, HRH1</i>       |
| Agranulocyte Adhesion and Diapedesis                        | 15                        | <i>CCL4, CCL5, CCL20, CXCL8, CXCL11, CXCL13, CXCR4, IL1B, IL1RN, ITGA4, MMP1, MMP3, MMP12, MMP13, MYH7</i>          | 3                           | <i>CDN19, HRH1, MYH7B</i> |
| Interleukin-10 Signaling                                    | 11                        | <i>CCR1, CCR5, CD14, HMOX1, IL6, IL10, IL18RAP, IL18, IL1RAP, IL1RN, MAPK13</i>                                     | 0                           | NA                        |
| Communication between Innate and Adaptive Immune Cells      | 12                        | <i>CCL4, CCL5, CXCL8, HLA-DRA, IL6, IL10, IL1B, IL1RN, TLR2, TLR10, TNFRSF17, TNFSF13B</i>                          | 0                           | NA                        |

Note: NA indicates not applicable

Online table 3: Up and down-regulated molecules comparing flow-diverted versus untreated aneurysms, determined by IPA.

| Gene Symbol     | Gene name                                                            | Gene main function determined by Gene Ontology                                                                                                                 | Fold Change | P Value  | False Discovery Rate (q Value) | Direction of Expression |
|-----------------|----------------------------------------------------------------------|----------------------------------------------------------------------------------------------------------------------------------------------------------------|-------------|----------|--------------------------------|-------------------------|
| <b>ADAMTS14</b> | ADAM metallopeptidase with thrombospondin type 1 motif, 14           | Proteinaceous extracellular matrix                                                                                                                             | 2,265       | 6,43E-04 | 3,81E-02                       | Up-Regulated            |
| <b>ADAMTS4</b>  | ADAM metallopeptidase with thrombospondin type 1 motif, 4            | Proteinaceous extracellular matrix                                                                                                                             | 3,275       | 4,22E-07 | 1,41E-03                       | Up-Regulated            |
| <b>ALAS2</b>    | 5'-aminolevulinatase synthase 2                                      | Porphyrin-containing compound metabolic process                                                                                                                | 2,34        | 1,19E-03 | 4,90E-02                       | Up-Regulated            |
| <b>APLN</b>     | Apelin                                                               | Positive regulation of corticotropin-releasing hormone secretion                                                                                               | 4,412       | 2,37E-05 | 9,93E-03                       | Up-Regulated            |
| <b>ARG1</b>     | Arginase 1                                                           | Cellular response to transforming growth factor beta stimulus                                                                                                  | 2,451       | 2,42E-03 | 6,91E-02                       | Up-Regulated            |
| <b>ASPM</b>     | Asp (abnormal spindle) homolog, microcephaly associated (Drosophila) | Positive regulation of canonical Wnt signaling pathway                                                                                                         | 2,623       | 3,22E-04 | 2,69E-02                       | Up-Regulated            |
| <b>ATP6V0D2</b> | Atpase, H <sup>+</sup> transporting, lysosomal 38kda, V0 subunit d2  | Vacuolar proton-transporting V-type atpase complex                                                                                                             | 2,422       | 4,02E-03 | 9,07E-02                       | Up-Regulated            |
| <b>AURKB</b>    | Aurora kinase B                                                      | Anaphase-promoting complex-dependent proteasomal ubiquitin-dependent protein catabolic process                                                                 | 3,335       | 9,08E-04 | 4,41E-02                       | Up-Regulated            |
| <b>BCL6B</b>    | B-cell CLL/lymphoma 6, member B                                      | RNA polymerase II transcription regulatory region sequence-specific DNA binding transcription factor activity involved in negative regulation of transcription | 2,615       | 1,56E-04 | 2,06E-02                       | Up-Regulated            |
| <b>BUB1</b>     | BUB1 mitotic checkpoint serine/threonine kinase                      | Positive regulation of intrinsic apoptotic signaling pathway                                                                                                   | 2,934       | 8,31E-04 | 4,17E-02                       | Up-Regulated            |
| <b>BUB1B</b>    | BUB1 mitotic checkpoint serine/threonine kinase B                    | Anaphase-promoting complex-dependent proteasomal ubiquitin-dependent protein catabolic process                                                                 | 2,734       | 2,27E-04 | 2,43E-02                       | Up-Regulated            |
| <b>C17orf53</b> | Chromosome 17 open reading frame 53                                  | Unknown                                                                                                                                                        | 2,01        | 4,21E-04 | 3,13E-02                       | Up-Regulated            |
| <b>CA1</b>      | Carbonic anhydrase I                                                 | Small molecule metabolic process                                                                                                                               | 2,999       | 2,45E-04 | 2,48E-02                       | Up-Regulated            |

|                 |                                                |                                                                                                                  |       |          |          |              |
|-----------------|------------------------------------------------|------------------------------------------------------------------------------------------------------------------|-------|----------|----------|--------------|
| <b>CA12</b>     | Carbonic anhydrase XII                         | Small molecule metabolic process                                                                                 | 2,38  | 3,49E-04 | 2,78E-02 | Up-Regulated |
| <b>CA2</b>      | Carbonic anhydrase II                          | Positive regulation of dipeptide transmembrane transport                                                         | 2,728 | 5,05E-04 | 3,47E-02 | Up-Regulated |
| <b>CA9</b>      | Carbonic anhydrase IX                          | Regulation of transcription from RNA polymerase II promoter in response to hypoxia                               | 2,561 | 1,36E-04 | 1,90E-02 | Up-Regulated |
| <b>CAMK1G</b>   | Calcium/calmodulin-dependent protein kinase IG | Calcium- and calmodulin-dependent protein kinase complex                                                         | 2,953 | 2,50E-04 | 2,49E-02 | Up-Regulated |
| <b>CCDC163P</b> | Coiled-coil domain containing 163, pseudogene  | Unknown                                                                                                          | 2,131 | 4,99E-04 | 3,46E-02 | Up-Regulated |
| <b>CCL2</b>     | Chemokine (C-C motif) ligand 2                 | G-protein coupled receptor signaling pathway, coupled to cyclic nucleotide second messenger                      | 2,062 | 1,08E-03 | 4,68E-02 | Up-Regulated |
| <b>CCNB1</b>    | Cyclin B1                                      | Positive regulation of ubiquitin-protein ligase activity involved in regulation of mitotic cell cycle transition | 3,289 | 6,76E-05 | 1,31E-02 | Up-Regulated |
| <b>CCNB2</b>    | Cyclin B2                                      | G2/M transition of mitotic cell cycle                                                                            | 3,441 | 5,43E-04 | 3,58E-02 | Up-Regulated |
| <b>CD72</b>     | CD72 molecule                                  | Transmembrane signaling receptor activity                                                                        | 2,52  | 2,62E-03 | 7,19E-02 | Up-Regulated |
| <b>CDC20</b>    | Cell division cycle 20                         | Positive regulation of ubiquitin-protein ligase activity involved in regulation of mitotic cell cycle transition | 2,792 | 3,88E-04 | 2,97E-02 | Up-Regulated |
| <b>CDC25A</b>   | Cell division cycle 25A                        | Regulation of cyclin-dependent protein serine/threonine kinase activity                                          | 2,54  | 7,99E-04 | 4,11E-02 | Up-Regulated |
| <b>CDC45</b>    | Cell division cycle 45                         | Pre-replicative complex assembly involved in nuclear cell cycle DNA replication                                  | 3,057 | 6,27E-04 | 3,81E-02 | Up-Regulated |
| <b>CDCA2</b>    | Cell division cycle associated 2               | Positive regulation of protein dephosphorylation                                                                 | 2,488 | 2,53E-03 | 7,04E-02 | Up-Regulated |
| <b>CDCA3</b>    | Cell division cycle associated 3               | Mitotic nuclear division                                                                                         | 2,028 | 4,82E-05 | 1,18E-02 | Up-Regulated |
| <b>CDCA7</b>    | Cell division cycle associated 7               | Regulation of transcription, DNA-templated                                                                       | 3,687 | 5,54E-04 | 3,61E-02 | Up-Regulated |
| <b>CDH5</b>     | Cadherin 5, type 2 (vascular endothelium)      | Homophilic cell adhesion via plasma membrane adhesion molecules                                                  | 2,032 | 4,80E-04 | 3,34E-02 | Up-Regulated |
| <b>CDK1</b>     | Cyclin-dependent kinase 1                      | Positive regulation of ubiquitin-protein ligase activity involved in regulation of mitotic cell cycle transition | 2,41  | 6,59E-04 | 3,81E-02 | Up-Regulated |
| <b>CELSR3</b>   | Cadherin, EGF LAG seven-pass G-type            | Homophilic cell adhesion via plasma membrane adhesion molecules                                                  | 2,625 | 1,69E-03 | 5,80E-02 | Up-Regulated |

|               |                                                        |                                                                                          |        |          |          |                |
|---------------|--------------------------------------------------------|------------------------------------------------------------------------------------------|--------|----------|----------|----------------|
|               | receptor 3                                             |                                                                                          |        |          |          |                |
| <b>CENPA</b>  | Centromere protein A                                   | Protein localization to chromosome, centromeric region                                   | 3,83   | 1,36E-04 | 1,90E-02 | Up-Regulated   |
| <b>CENPE</b>  | Centromere protein E, 312kda                           | Antigen processing and presentation of exogenous peptide antigen via MHC class II        | 2,257  | 2,74E-03 | 7,33E-02 | Up-Regulated   |
| <b>CENPT</b>  | Centromere protein T                                   | Small gtpase mediated signal transduction                                                | 2,089  | 1,24E-03 | 4,96E-02 | Up-Regulated   |
| <b>CEP55</b>  | Centrosomal protein 55kda                              | Establishment of protein localization                                                    | 2,791  | 1,32E-03 | 5,15E-02 | Up-Regulated   |
| <b>CFAP52</b> | Cilia and flagella associated protein 52               | Cell projection                                                                          | 3,426  | 1,07E-06 | 2,03E-03 | Up-Regulated   |
| <b>CHI3L1</b> | Chitinase 3-like 1 (cartilage glycoprotein-39)         | Positive regulation of peptidyl-threonine phosphorylation                                | 4,249  | 3,04E-06 | 3,05E-03 | Up-Regulated   |
| <b>CHRDL2</b> | Chordin-like 2                                         | Negative regulation of BMP signaling pathway                                             | 3,005  | 6,76E-05 | 1,31E-02 | Up-Regulated   |
| <b>CHTOP</b>  | Chromatin target of PRMT1                              | Regulation of transcription, DNA-templated                                               | 3,228  | 8,12E-04 | 4,16E-02 | Up-Regulated   |
| <b>CKS2</b>   | CDC28 protein kinase regulatory subunit 2              | Regulation of cyclin-dependent protein serine/threonine kinase activity                  | 3,405  | 2,11E-05 | 9,21E-03 | Up-Regulated   |
| <b>CLSTN2</b> | Calsyntenin 2                                          | Homophilic cell adhesion via plasma membrane adhesion molecules                          | 4,168  | 7,91E-05 | 1,42E-02 | Up-Regulated   |
| <b>COL9A1</b> | Collagen, type IX, alpha 1                             | Extracellular matrix structural constituent conferring tensile strength                  | 3,882  | 2,65E-03 | 7,19E-02 | Up-Regulated   |
| <b>CTSE</b>   | Cathepsin E                                            | Antigen processing and presentation of exogenous peptide antigen via MHC class II        | 2,614  | 7,10E-04 | 3,84E-02 | Up-Regulated   |
| <b>CXCL13</b> | Chemokine (C-X-C motif) ligand 13                      | Negative regulation of endothelial cell chemotaxis to fibroblast growth factor           | 2,257  | 2,84E-04 | 2,64E-02 | Up-Regulated   |
| <b>CXCL8</b>  | Chemokine (C-X-C motif) ligand 8                       | Regulation of single stranded viral RNA replication via double stranded DNA intermediate | 4,781  | 1,32E-05 | 8,84E-03 | Up-Regulated   |
| <b>CXCL8</b>  | Chemokine (C-X-C motif) ligand 8                       | Regulation of single stranded viral RNA replication via double stranded DNA intermediate | 3,11   | 2,45E-04 | 2,48E-02 | Up-Regulated   |
| <b>CXCR4</b>  | Chemokine (C-X-C motif) receptor 4                     | Positive regulation of cytosolic calcium ion concentration                               | 2,16   | 1,53E-03 | 5,58E-02 | Up-Regulated   |
| <b>DAPL1</b>  | Death associated protein-like 1                        | Cellular response to amino acid starvation                                               | -3,752 | 6,45E-13 | 6,48E-09 | Down-Regulated |
| <b>DLGAP5</b> | Discs, large (Drosophila) homolog-associated protein 5 | Positive regulation of mitotic metaphase/anaphase transition                             | 2,864  | 2,02E-04 | 2,30E-02 | Up-Regulated   |

|                |                                                           |                                                                                                                                                                                                   |        |          |          |                |
|----------------|-----------------------------------------------------------|---------------------------------------------------------------------------------------------------------------------------------------------------------------------------------------------------|--------|----------|----------|----------------|
| <b>DLL4</b>    | Delta-like 4 (Drosophila)                                 | Negative regulation of blood vessel endothelial cell proliferation involved in sprouting angiogenesis                                                                                             | 2,073  | 5,57E-05 | 1,20E-02 | Up-Regulated   |
| <b>DNASE2B</b> | Deoxyribonuclease II beta                                 | Deoxyribonuclease II activity                                                                                                                                                                     | 2,515  | 2,77E-03 | 7,36E-02 | Up-Regulated   |
| <b>DRD1</b>    | Dopamine receptor D1                                      | Positive regulation of cytosolic calcium ion concentration involved in phospholipase C-activating G-protein coupled signaling pathway                                                             | 2,061  | 2,97E-03 | 7,56E-02 | Up-Regulated   |
| <b>DUSP5</b>   | Dual specificity phosphatase 5                            | MAP kinase tyrosine/serine/threonine phosphatase activity                                                                                                                                         | 2,072  | 1,64E-04 | 2,13E-02 | Up-Regulated   |
| <b>E2F1</b>    | E2F transcription factor 1                                | Positive regulation of protein insertion into mitochondrial membrane involved in apoptotic signaling pathway                                                                                      | 2,319  | 9,77E-04 | 4,49E-02 | Up-Regulated   |
| <b>E2F8</b>    | E2F transcription factor 8                                | RNA polymerase II core promoter proximal region sequence-specific DNA binding transcription factor activity involved in negative regulation of transcription                                      | 2,583  | 2,51E-03 | 7,03E-02 | Up-Regulated   |
| <b>EGLN3</b>   | Egl-9 family hypoxia-inducible factor 3                   | Oxidoreductase activity, acting on paired donors, with incorporation or reduction of molecular oxygen, 2-oxoglutarate as one donor, and incorporation of one atom each of oxygen into both donors | 3,25   | 3,50E-05 | 1,13E-02 | Up-Regulated   |
| <b>ENO2</b>    | Enolase 2 (gamma, neuronal)                               | Phosphopyruvate hydratase activity                                                                                                                                                                | 2,914  | 4,91E-06 | 4,11E-03 | Up-Regulated   |
| <b>ERO1L</b>   | ERO1-like (S. Cerevisiae)                                 | Oxidoreductase activity, acting on a sulfur group of donors, disulfide as acceptor                                                                                                                | 2,039  | 4,96E-05 | 1,18E-02 | Up-Regulated   |
| <b>ETV4</b>    | Ets variant 4                                             | RNA polymerase II core promoter proximal region sequence-specific DNA binding transcription factor activity involved in positive regulation of transcription                                      | 3,485  | 8,91E-05 | 1,46E-02 | Up-Regulated   |
| <b>EXO1</b>    | Exonuclease 1                                             | Humoral immune response mediated by circulating immunoglobulin                                                                                                                                    | 2,971  | 5,88E-04 | 3,71E-02 | Up-Regulated   |
| <b>EXOC3L1</b> | Exocyst complex component 3-like 1                        | Peptide hormone secretion                                                                                                                                                                         | 2,521  | 2,78E-05 | 1,03E-02 | Up-Regulated   |
| <b>EZH2</b>    | Enhancer of zeste 2 polycomb repressive complex 2 subunit | Skeletal muscle satellite cell maintenance involved in skeletal muscle regeneration                                                                                                               | 2,197  | 3,91E-04 | 2,97E-02 | Up-Regulated   |
| <b>FABP5</b>   | Fatty acid binding protein 5 (psoriasis-associated)       | Phosphatidylcholine biosynthetic process                                                                                                                                                          | 2,436  | 7,69E-05 | 1,42E-02 | Up-Regulated   |
| <b>FAM150A</b> | Family with sequence similarity 150, member A             | Extracellular region                                                                                                                                                                              | -2,555 | 1,97E-05 | 9,21E-03 | Down-Regulated |
| <b>FAM179A</b> | Family with sequence similarity 179, member A             | Unknown                                                                                                                                                                                           | 2,649  | 2,22E-03 | 6,79E-02 | Up-Regulated   |



|                |                                                     |                                                                                                                                                              |        |          |          |                |
|----------------|-----------------------------------------------------|--------------------------------------------------------------------------------------------------------------------------------------------------------------|--------|----------|----------|----------------|
| <b>FAM64A</b>  | Family with sequence similarity 64, member A        | Mitotic nuclear division                                                                                                                                     | 3,601  | 5,17E-05 | 1,18E-02 | Up-Regulated   |
| <b>FGB</b>     | Fibrinogen beta chain                               | Negative regulation of extrinsic apoptotic signaling pathway via death domain receptors                                                                      | 2,824  | 1,35E-03 | 5,18E-02 | Up-Regulated   |
| <b>FGF23</b>   | Fibroblast growth factor 23                         | Positive regulation of MAPKKK cascade by fibroblast growth factor receptor signaling pathway                                                                 | 5,662  | 3,01E-06 | 3,05E-03 | Up-Regulated   |
| <b>FGFBP1</b>  | Fibroblast growth factor binding protein 1          | Activation of mitophagy in response to mitochondrial depolarization                                                                                          | -2,183 | 3,00E-05 | 1,04E-02 | Down-Regulated |
| <b>FOXM1</b>   | Forkhead box M1                                     | DNA damage response, signal transduction by p53 class mediator resulting in transcription of p21 class mediator                                              | 3,239  | 2,11E-04 | 2,33E-02 | Up-Regulated   |
| <b>FTL</b>     | Ferritin, light polypeptide                         | Post-Golgi vesicle-mediated transport                                                                                                                        | 2,047  | 1,46E-03 | 5,39E-02 | Up-Regulated   |
| <b>GDF6</b>    | Growth differentiation factor 6                     | Positive regulation of pathway-restricted SMAD protein phosphorylation                                                                                       | 2,114  | 4,38E-03 | 9,42E-02 | Up-Regulated   |
| <b>GPR158</b>  | G protein-coupled receptor 158                      | Regulation of G-protein coupled receptor protein signaling pathway                                                                                           | 4,747  | 5,18E-05 | 1,18E-02 | Up-Regulated   |
| <b>GSG2</b>    | Germ cell associated 2 (haspin)                     | Histone H3-T3 phosphorylation involved in chromosome passenger complex localization to kinetochore                                                           | 2,725  | 7,60E-04 | 3,95E-02 | Up-Regulated   |
| <b>HAS2</b>    | Hyaluronan synthase 2                               | Positive regulation of substrate adhesion-dependent cell spreading                                                                                           | 2,285  | 3,71E-05 | 1,16E-02 | Up-Regulated   |
| <b>HBB</b>     | Hemoglobin, beta                                    | Positive regulation of nitric oxide biosynthetic process                                                                                                     | 2,46   | 1,27E-03 | 5,03E-02 | Up-Regulated   |
| <b>HMGA2</b>   | High mobility group AT-hook 2                       | RNA polymerase II core promoter proximal region sequence-specific DNA binding transcription factor activity involved in negative regulation of transcription | 4,412  | 6,98E-07 | 1,75E-03 | Up-Regulated   |
| <b>HMMR</b>    | Hyaluronan-mediated motility receptor (RHAMM)       | Glycosaminoglycan metabolic process                                                                                                                          | 3,534  | 5,77E-05 | 1,20E-02 | Up-Regulated   |
| <b>HMOX1</b>   | Heme oxygenase 1                                    | Regulation of transcription from RNA polymerase II promoter in response to oxidative stress                                                                  | 3,643  | 2,77E-04 | 2,62E-02 | Up-Regulated   |
| <b>HP</b>      | Haptoglobin                                         | Activation of cysteine-type endopeptidase activity involved in apoptotic process                                                                             | 2,553  | 4,27E-05 | 1,18E-02 | Up-Regulated   |
| <b>IBSP</b>    | Integrin-binding sialoprotein                       | Cellular response to growth factor stimulus                                                                                                                  | 2,789  | 1,73E-03 | 5,85E-02 | Up-Regulated   |
| <b>ICAM2</b>   | Intercellular adhesion molecule 2                   | Stimulatory C-type lectin receptor signaling pathway                                                                                                         | 2,222  | 2,98E-04 | 2,69E-02 | Up-Regulated   |
| <b>IGF2BP3</b> | Insulin-like growth factor 2 mrna binding protein 3 | Regulation of cytokine biosynthetic process                                                                                                                  | 2,095  | 1,61E-03 | 5,68E-02 | Up-Regulated   |
| <b>IL12RB2</b> | Interleukin 12 receptor,                            | Positive regulation of interferon-gamma production                                                                                                           | 2,027  | 1,60E-03 | 5,68E-02 | Up-            |

|                 |                                                               |                                                                                           |       |          |          |              |
|-----------------|---------------------------------------------------------------|-------------------------------------------------------------------------------------------|-------|----------|----------|--------------|
|                 | beta 2                                                        |                                                                                           |       |          |          | Regulated    |
| <b>IL23A</b>    | Interleukin 23, alpha subunit p19                             | Positive regulation of granulocyte macrophage colony-stimulating factor production        | 2,748 | 6,82E-04 | 3,81E-02 | Up-Regulated |
| <b>IL6</b>      | Interleukin 6                                                 | Negative regulation of cysteine-type endopeptidase activity involved in apoptotic process | 4,375 | 2,86E-05 | 1,03E-02 | Up-Regulated |
| <b>INHBB</b>    | Inhibin, beta B                                               | Positive regulation of pathway-restricted SMAD protein phosphorylation                    | 2,545 | 3,85E-04 | 2,97E-02 | Up-Regulated |
| <b>IQGAP3</b>   | IQ motif containing gtpase activating protein 3               | Positive regulation of mammary gland epithelial cell proliferation                        | 2,343 | 4,39E-04 | 3,17E-02 | Up-Regulated |
| <b>IRG1</b>     | Immunoresponsive 1 homolog (mouse)                            | Positive regulation of reactive oxygen species metabolic process                          | 2,668 | 1,16E-03 | 4,85E-02 | Up-Regulated |
| <b>IYD</b>      | Iodotyrosine deiodinase                                       | Cellular nitrogen compound metabolic process                                              | 2,745 | 7,77E-05 | 1,42E-02 | Up-Regulated |
| <b>KIAA0101</b> | Kiaa0101                                                      | Cellular response to DNA damage stimulus                                                  | 3,426 | 8,88E-05 | 1,46E-02 | Up-Regulated |
| <b>KIF11</b>    | Kinesin family member 11                                      | Antigen processing and presentation of exogenous peptide antigen via MHC class II         | 2,42  | 1,62E-03 | 5,68E-02 | Up-Regulated |
| <b>KIF14</b>    | Kinesin family member 14                                      | SCF-dependent proteasomal ubiquitin-dependent protein catabolic process                   | 2,574 | 2,67E-04 | 2,55E-02 | Up-Regulated |
| <b>KIF18B</b>   | Kinesin family member 18B                                     | ATP-dependent microtubule motor activity, plus-end-directed                               | 4,077 | 1,64E-05 | 9,21E-03 | Up-Regulated |
| <b>KIF20A</b>   | Kinesin family member 20A                                     | Cell separation after cytokinesis                                                         | 2,645 | 1,25E-04 | 1,88E-02 | Up-Regulated |
| <b>KIF21A</b>   | Kinesin family member 21A                                     | Microtubule-based movement                                                                | 2,216 | 2,35E-03 | 6,84E-02 | Up-Regulated |
| <b>KIF2A</b>    | Kinesin heavy chain member 2A                                 | Antigen processing and presentation of exogenous peptide antigen via MHC class II         | 2,807 | 1,18E-03 | 4,90E-02 | Up-Regulated |
| <b>KIFC1</b>    | Kinesin family member C1                                      | ATP-dependent microtubule motor activity, minus-end-directed                              | 2,816 | 5,70E-05 | 1,20E-02 | Up-Regulated |
| <b>KIT</b>      | V-kit Hardy-Zuckerman 4 feline sarcoma viral oncogene homolog | Positive regulation of sequence-specific DNA binding transcription factor activity        | 2,278 | 1,80E-04 | 2,18E-02 | Up-Regulated |
| <b>KLHL3</b>    | Kelch-like family member 3                                    | Protein ubiquitination involved in ubiquitin-dependent protein catabolic process          | 2,011 | 4,94E-05 | 1,18E-02 | Up-Regulated |
| <b>KRT32</b>    | Keratin 32, type I                                            | Structural molecule activity                                                              | 2,815 | 1,23E-03 | 4,96E-02 | Up-Regulated |
| <b>KRT8</b>     | Keratin 8, type II                                            | Cell differentiation involved in embryonic placenta development                           | 6,233 | 1,21E-06 | 2,03E-03 | Up-Regulated |

|               |                                                                   |                                                                                                |        |          |          |                |
|---------------|-------------------------------------------------------------------|------------------------------------------------------------------------------------------------|--------|----------|----------|----------------|
| <b>LCTL</b>   | Lactase-like                                                      | Hydrolase activity, hydrolyzing O-glycosyl compounds                                           | 2,614  | 1,02E-03 | 4,51E-02 | Up-Regulated   |
| <b>LECT1</b>  | Leukocyte cell derived chemotaxin 1                               | Negative regulation of vascular endothelial growth factor receptor signaling pathway           | -2,373 | 4,32E-04 | 3,17E-02 | Down-Regulated |
| <b>MAGEL2</b> | Melanoma antigen family L2                                        | Negative regulation of transcription, DNA-templated                                            | 2,199  | 2,21E-03 | 6,78E-02 | Up-Regulated   |
| <b>MAPK13</b> | Mitogen-activated protein kinase 13                               | Vascular endothelial growth factor receptor signaling pathway                                  | 2,134  | 1,59E-03 | 5,68E-02 | Up-Regulated   |
| <b>MARCO</b>  | Macrophage receptor with collagenous structure                    | Signaling pattern recognition receptor activity                                                | -2,396 | 2,94E-04 | 2,69E-02 | Down-Regulated |
| <b>MCM8</b>   | Minichromosome maintenance complex component 8                    | Double-strand break repair via homologous recombination                                        | 2,348  | 1,83E-03 | 6,02E-02 | Up-Regulated   |
| <b>MELK</b>   | Maternal embryonic leucine zipper kinase                          | Intrinsic apoptotic signaling pathway in response to oxidative stress                          | 3,352  | 7,12E-04 | 3,84E-02 | Up-Regulated   |
| <b>MFSD5</b>  | Major facilitator superfamily domain containing 5                 | Substrate-specific transmembrane transporter activity                                          | 3,465  | 3,53E-06 | 3,23E-03 | Up-Regulated   |
| <b>MMP1</b>   | Matrix metalloproteinase 1                                        | Positive regulation of protein oligomerization                                                 | 4,467  | 5,20E-04 | 3,50E-02 | Up-Regulated   |
| <b>MOGAT1</b> | Monoacylglycerol O-acyltransferase 1                              | 2-acylglycerol O-acyltransferase activity                                                      | 2,672  | 4,51E-04 | 3,21E-02 | Up-Regulated   |
| <b>MRPL32</b> | Mitochondrial ribosomal protein L32                               | Mitochondrial translational termination                                                        | 2,448  | 2,07E-05 | 9,21E-03 | Up-Regulated   |
| <b>MSH5</b>   | Muts homolog 5                                                    | Homologous chromosome segregation                                                              | 2,293  | 1,90E-03 | 6,13E-02 | Up-Regulated   |
| <b>MTFP1</b>  | Mitochondrial fission process 1                                   | Integral component of membrane                                                                 | 2,889  | 3,11E-04 | 2,69E-02 | Up-Regulated   |
| <b>MYH7B</b>  | Myosin, heavy chain 7B, cardiac muscle, beta                      | Metabolic process                                                                              | -2,107 | 4,66E-04 | 3,27E-02 | Down-Regulated |
| <b>NCAPG</b>  | Non-SMC condensin I complex, subunit G                            | Mitotic chromosome condensation                                                                | 2,472  | 1,55E-03 | 5,61E-02 | Up-Regulated   |
| <b>NEK2</b>   | NIMA-related kinase 2                                             | Anaphase-promoting complex-dependent proteasomal ubiquitin-dependent protein catabolic process | 3,311  | 5,83E-05 | 1,20E-02 | Up-Regulated   |
| <b>NKAIN1</b> | Na <sup>+</sup> /K <sup>+</sup> transporting atpase interacting 1 | Regulation of sodium ion transport                                                             | 3,127  | 1,27E-04 | 1,88E-02 | Up-Regulated   |
| <b>NUF2</b>   | NUF2, NDC80 kinetochore complex component                         | Small gtpase mediated signal transduction                                                      | 2,809  | 4,32E-04 | 3,17E-02 | Up-Regulated   |

|                 |                                                                                       |                                                                                                                                                              |       |          |          |              |
|-----------------|---------------------------------------------------------------------------------------|--------------------------------------------------------------------------------------------------------------------------------------------------------------|-------|----------|----------|--------------|
| <b>PBK</b>      | PDZ binding kinase                                                                    | Negative regulation of proteasomal ubiquitin-dependent protein catabolic process                                                                             | 2,589 | 2,36E-03 | 6,84E-02 | Up-Regulated |
| <b>PDE4B</b>    | Phosphodiesterase 4B, camp-specific                                                   | Regulation of high voltage-gated calcium channel activity                                                                                                    | 2,371 | 2,92E-03 | 7,52E-02 | Up-Regulated |
| <b>PDGFB</b>    | Platelet-derived growth factor beta polypeptide                                       | Positive regulation of metanephric mesenchymal cell migration by platelet-derived growth factor receptor-beta signaling pathway                              | 2,094 | 2,09E-04 | 2,33E-02 | Up-Regulated |
| <b>PIGR</b>     | Polymeric immunoglobulin receptor                                                     | Immunoglobulin transcytosis in epithelial cells mediated by polymeric immunoglobulin receptor                                                                | 2,808 | 2,84E-03 | 7,44E-02 | Up-Regulated |
| <b>PLA2G4F</b>  | Phospholipase A2, group IVF                                                           | Phosphatidylethanolamine acyl-chain remodeling                                                                                                               | 2,094 | 2,56E-03 | 7,10E-02 | Up-Regulated |
| <b>PLK1</b>     | Polo-like kinase 1                                                                    | Positive regulation of ubiquitin-protein ligase activity involved in regulation of mitotic cell cycle transition                                             | 2,09  | 1,07E-04 | 1,65E-02 | Up-Regulated |
| <b>POU2AF1</b>  | POU class 2 associating factor 1                                                      | Transcription from RNA polymerase II promoter                                                                                                                | 2,267 | 2,78E-03 | 7,36E-02 | Up-Regulated |
| <b>PRND</b>     | Prion protein 2 (dublet)                                                              | Anchored component of membrane                                                                                                                               | 8,719 | 2,78E-06 | 3,05E-03 | Up-Regulated |
| <b>PRR11</b>    | Proline rich 11                                                                       | Regulation of cell cycle                                                                                                                                     | 3,068 | 7,26E-04 | 3,88E-02 | Up-Regulated |
| <b>PTGS2</b>    | Prostaglandin-endoperoxide synthase 2 (prostaglandin G/H synthase and cyclooxygenase) | Positive regulation of cell migration involved in sprouting angiogenesis                                                                                     | 3,434 | 3,07E-08 | 1,54E-04 | Up-Regulated |
| <b>PTX3</b>     | Pentraxin 3, long                                                                     | RNA polymerase II core promoter proximal region sequence-specific DNA binding transcription factor activity involved in positive regulation of transcription | 2,42  | 1,95E-04 | 2,25E-02 | Up-Regulated |
| <b>PVRL2</b>    | Poliovirus receptor-related 2 (herpesvirus entry mediator B)                          | Positive regulation of natural killer cell mediated cytotoxicity directed against tumor cell target                                                          | 2,069 | 4,62E-03 | 9,68E-02 | Up-Regulated |
| <b>RACGAP1</b>  | Rac gtpase activating protein 1                                                       | Antigen processing and presentation of exogenous peptide antigen via MHC class II                                                                            | 2,331 | 4,38E-04 | 3,17E-02 | Up-Regulated |
| <b>RAD51AP1</b> | RAD51 associated protein 1                                                            | Regulation of double-strand break repair via homologous recombination                                                                                        | 2,328 | 1,76E-03 | 5,90E-02 | Up-Regulated |
| <b>RELT</b>     | RELT tumor necrosis factor receptor                                                   | Integral component of membrane                                                                                                                               | 2,375 | 3,14E-04 | 2,69E-02 | Up-Regulated |
| <b>RM12</b>     | Recq mediated genome instability 2                                                    | DNA replication                                                                                                                                              | 2,847 | 7,08E-04 | 3,84E-02 | Up-Regulated |

|                 |                                                                                                        |                                                                                    |        |          |          |                |
|-----------------|--------------------------------------------------------------------------------------------------------|------------------------------------------------------------------------------------|--------|----------|----------|----------------|
| <b>RPS6KL1</b>  | Ribosomal protein S6 kinase-like 1                                                                     | Intracellular membrane-bounded organelle                                           | 2,792  | 3,61E-04 | 2,85E-02 | Up-Regulated   |
| <b>RTN4RL2</b>  | Reticulon 4 receptor-like 2                                                                            | Anchored component of plasma membrane                                              | 2,414  | 1,27E-04 | 1,88E-02 | Up-Regulated   |
| <b>S100A8</b>   | S100 calcium binding protein A8                                                                        | Activation of cysteine-type endopeptidase activity involved in apoptotic process   | 2,915  | 9,91E-04 | 4,49E-02 | Up-Regulated   |
| <b>S1PR3</b>    | Sphingosine-1-phosphate receptor 3                                                                     | Adenylate cyclase-inhibiting G-protein coupled receptor signaling pathway          | 2,149  | 4,05E-03 | 9,11E-02 | Up-Regulated   |
| <b>SCG2</b>     | Secretogranin II                                                                                       | Negative regulation of sequence-specific DNA binding transcription factor activity | 3,446  | 6,64E-04 | 3,81E-02 | Up-Regulated   |
| <b>SCIMP</b>    | SLP adaptor and CSK interacting membrane protein                                                       | Positive regulation of ERK1 and ERK2 cascade                                       | 2,813  | 3,97E-03 | 9,05E-02 | Up-Regulated   |
| <b>SCIN</b>     | Scinderin                                                                                              | Positive regulation of megakaryocyte differentiation                               | -2,287 | 1,20E-05 | 8,63E-03 | Down-Regulated |
| <b>SCN4A</b>    | Sodium channel, voltage gated, type IV alpha subunit                                                   | Membrane depolarization during action potential                                    | 3,215  | 6,10E-04 | 3,81E-02 | Up-Regulated   |
| <b>SELE</b>     | Selectin E                                                                                             | Heterophilic cell-cell adhesion via plasma membrane cell adhesion molecules        | 2,299  | 1,69E-04 | 2,13E-02 | Up-Regulated   |
| <b>SERPINF2</b> | Serpin peptidase inhibitor, clade F (alpha-2 antiplasmin, pigment epithelium derived factor), member 2 | Positive regulation of transcription from RNA polymerase II promoter               | 2,666  | 3,25E-04 | 2,69E-02 | Up-Regulated   |
| <b>SIRPB1</b>   | Signal-regulatory protein beta 1                                                                       | Cell surface receptor signaling pathway                                            | 2,393  | 2,90E-03 | 7,51E-02 | Up-Regulated   |
| <b>SIRPB1</b>   | Signal-regulatory protein beta 1                                                                       | Cell surface receptor signaling pathway                                            | 3,979  | 3,31E-04 | 2,73E-02 | Up-Regulated   |
| <b>SIRPB1</b>   | Signal-regulatory protein beta 1                                                                       | Cell surface receptor signaling pathway                                            | 5,463  | 9,20E-05 | 1,47E-02 | Up-Regulated   |
| <b>SLC11A1</b>  | Solute carrier family 11 (proton-coupled divalent metal ion transporter), member 1                     | Positive regulation of dendritic cell antigen processing and presentation          | 3,851  | 4,68E-05 | 1,18E-02 | Up-Regulated   |
| <b>SLC16A6</b>  | Solute carrier family 16, member 6                                                                     | Monocarboxylic acid transmembrane transporter activity                             | 2,335  | 6,66E-04 | 3,81E-02 | Up-Regulated   |
| <b>SLC45A1</b>  | Solute carrier family 45,                                                                              | Glucose transmembrane transporter activity                                         | 2,059  | 1,38E-03 | 5,26E-02 | Up-            |

|                 |                                                         |                                                                                  |        |          |          |                |
|-----------------|---------------------------------------------------------|----------------------------------------------------------------------------------|--------|----------|----------|----------------|
|                 | member 1                                                |                                                                                  |        |          |          | Regulated      |
| <b>SLC4A2</b>   | Solute carrier family 4 (anion exchanger), member 2     | Anion transmembrane transporter activity                                         | 2,497  | 8,88E-05 | 1,46E-02 | Up-Regulated   |
| <b>SMCO2</b>    | Single-pass membrane protein with coiled-coil domains 2 | Integral component of membrane                                                   | 2,498  | 1,35E-03 | 5,18E-02 | Up-Regulated   |
| <b>SNORA7B</b>  | Small nucleolar RNA, H/ACA box 7B                       | Unknown                                                                          | 2,601  | 5,27E-04 | 3,53E-02 | Up-Regulated   |
| <b>SNORD10</b>  | Small nucleolar RNA, C/D box 10                         | Unknown                                                                          | 2,58   | 2,57E-05 | 1,03E-02 | Up-Regulated   |
| <b>SPAG5</b>    | Sperm associated antigen 5                              | Regulation of attachment of spindle microtubules to kinetochore                  | 3,315  | 3,73E-04 | 2,90E-02 | Up-Regulated   |
| <b>SRCIN1</b>   | SRC kinase signaling inhibitor 1                        | Negative regulation of protein tyrosine kinase activity                          | -3,295 | 1,98E-05 | 9,21E-03 | Down-Regulated |
| <b>STIL</b>     | SCL/TAL1 interrupting locus                             | Positive regulation of cyclin-dependent protein serine/threonine kinase activity | 3,04   | 8,47E-04 | 4,21E-02 | Up-Regulated   |
| <b>STMN1</b>    | Stathmin 1                                              | Positive regulation of cellular component movement                               | 2,375  | 2,46E-03 | 6,98E-02 | Up-Regulated   |
| <b>TCF19</b>    | Transcription factor 19                                 | Regulation of transcription from RNA polymerase II promoter                      | 2,509  | 5,69E-04 | 3,61E-02 | Up-Regulated   |
| <b>TDRD5</b>    | Tudor domain containing 5                               | DNA methylation involved in gamete generation                                    | 2,201  | 4,27E-05 | 1,18E-02 | Up-Regulated   |
| <b>TIMP1</b>    | TIMP metalloproteinase inhibitor 1                      | Negative regulation of membrane protein ectodomain proteolysis                   | 2,104  | 6,23E-04 | 3,81E-02 | Up-Regulated   |
| <b>TM4SF18</b>  | Transmembrane 4 L six family member 18                  | Integral component of membrane                                                   | 2,77   | 8,79E-05 | 1,46E-02 | Up-Regulated   |
| <b>TMEM151B</b> | Transmembrane protein 151B                              | Integral component of membrane                                                   | 3,543  | 3,14E-04 | 2,69E-02 | Up-Regulated   |
| <b>TREML2</b>   | Triggering receptor expressed on myeloid cells-like 2   | Integral component of membrane                                                   | 2,352  | 4,73E-03 | 9,82E-02 | Up-Regulated   |
| <b>TRIML2</b>   | Tripartite motif family-like 2                          | Response to retinoic acid                                                        | 3,336  | 1,35E-03 | 5,18E-02 | Up-Regulated   |
| <b>TROAP</b>    | Trophinin associated protein                            | Protein binding                                                                  | 3,307  | 3,13E-04 | 2,69E-02 | Up-Regulated   |
| <b>TTC7A</b>    | Tetratricopeptide repeat domain 7A                      | Cellular iron ion homeostasis                                                    | 2,378  | 4,50E-05 | 1,18E-02 | Up-Regulated   |

|                |                                                                  |                                                                                                                                    |       |          |          |              |
|----------------|------------------------------------------------------------------|------------------------------------------------------------------------------------------------------------------------------------|-------|----------|----------|--------------|
| <b>TUBA4A</b>  | Tubulin, alpha 4a                                                | 'De novo' posttranslational protein folding                                                                                        | 3,447 | 2,11E-05 | 9,21E-03 | Up-Regulated |
| <b>TVP23A</b>  | Trans-golgi network vesicle protein 23 homolog A (S. Cerevisiae) | Integral component of Golgi membrane                                                                                               | 2,283 | 2,84E-03 | 7,44E-02 | Up-Regulated |
| <b>UBE2T</b>   | Ubiquitin-conjugating enzyme E2T                                 | Cellular response to DNA damage stimulus                                                                                           | 2,696 | 5,67E-04 | 3,61E-02 | Up-Regulated |
| <b>UGGT2</b>   | UDP-glucose glycoprotein glucosyltransferase 2                   | UDP-glucose:glycoprotein glucosyltransferase activity                                                                              | 2,213 | 2,19E-03 | 6,78E-02 | Up-Regulated |
| <b>VEGFA</b>   | Vascular endothelial growth factor A                             | Positive regulation of endothelial cell chemotaxis by VEGF-activated vascular endothelial growth factor receptor signaling pathway | 2,741 | 1,63E-06 | 2,33E-03 | Up-Regulated |
| <b>WSCD1</b>   | WSC domain containing 1                                          | Integral component of membrane                                                                                                     | 2,752 | 3,83E-05 | 1,16E-02 | Up-Regulated |
| <b>ZMYND15</b> | Zinc finger, MYND-type containing 15                             | Negative regulation of transcription, DNA-templated                                                                                | 2,43  | 1,69E-03 | 5,80E-02 | Up-Regulated |
| <b>ZWILCH</b>  | Zwilch kinetochore protein                                       | Small gtpase mediated signal transduction                                                                                          | 3,099 | 3,48E-05 | 1,13E-02 | Up-Regulated |

Note: Genes were determined to be differentially expressed if the P value was  $<0.05$ , the false discovery rate was  $<0.01$ , and the fold change was  $> 2$  (up-regulated) or  $< - 2$  (down-regulated). Genes variation were determined by IPA software. Genes main functions were determined using gene ontology (<http://geneontology.org/>).

Online table 4: Most involved canonical pathways, flow diverter versus control, determined by IPA.

| Canonical Biological Pathway                               | No. of Genes Up-Regulated | Genes                                                              | No. of Genes Down-Regulated | Gene(s)      |
|------------------------------------------------------------|---------------------------|--------------------------------------------------------------------|-----------------------------|--------------|
| <b>Atherosclerosis Signaling</b>                           | 9                         | <i>CCL2, CXCL8, CXCR4, IL6, MMP1, PDGFB, PLA2G4F, S100A8, SELE</i> | 0                           | NA           |
| <b>Mitotic Roles of Polo-Like Kinase</b>                   | 7                         | <i>CCNB1, CCNB2, CDC20, CDC25A, CDK1, KIF11, PLK1</i>              | 0                           | NA           |
| <b>Hepatic Fibrosis / Hepatic Stellate Cell Activation</b> | 8                         | <i>CCL2, COL9A1, CXCL8, IL6, MMP1, PDGFB, TIMP1, VEGFA</i>         | 1                           | <i>MYH7B</i> |
| <b>Agranulocyte Adhesion and Diapedesis</b>                | 8                         | <i>CCL2, CDH5, CXCL8, CXCL13, CXCR4, ICAM2, MMP1, SELE</i>         | 1                           | <i>MYH7B</i> |
| <b>Interleukin-17 Signaling</b>                            | 6                         | <i>CCL2, CXCL8, IL6, MAPK13, PTGS2, TIMP1</i>                      | 0                           | NA           |

**Note:** NA indicates not applicable



**Online table 5: Results of RT-PCR and RNA-seq for selected molecules in coiled and flow-diverted aneurysms.**

| Molecule      | Coils versus untreated aneurysm |         | Flow diverter versus untreated aneurysm |         |
|---------------|---------------------------------|---------|-----------------------------------------|---------|
|               | RT-PCR                          | RNA-Seq | RT-PCR                                  | RNA-Seq |
|               | <b>PRND</b>                     | 5.8     | 3.6                                     | 8.7     |
| <b>FGF-23</b> | 7.4                             | 6.5     | 5.7                                     | 3.7     |
| <b>MMP1</b>   | 8.1                             | 8.0     | 4.5                                     | 3.9     |
| <b>SRCIN1</b> | - 4.2                           | - 3.3   | - 3.3                                   | - 2.4   |
| <b>DAPL1</b>  | - 3.9                           | - 4.2   | - 3.8                                   | - 4.2   |
| <b>HHIP</b>   | - 3.5                           | - 4.1   | x                                       | x       |

Values are expressed as log fold changes.

PRND: Prion protein 2, FGF-23: Fibroblast growth factor 23, MMP1: Matrix metalloproteinase 1, SRCIN1: SRC kinase signaling inhibitor 1, DAPL1: Death associated protein-like 1, HHIP: Hedgehog interacting protein.
